# Supplementary material for: GEOtop 2.0: simulating the combined energy and water balance at and below the land surface accounting for soil freezing, snow cover and terrain effects
Source: Copernicus journal article supplement (doi:10.5194/gmd-7-2831-2014), 2014-12-03

Jungfrau ridge south (black=Geotop, red=measurement, year 2005/2006)

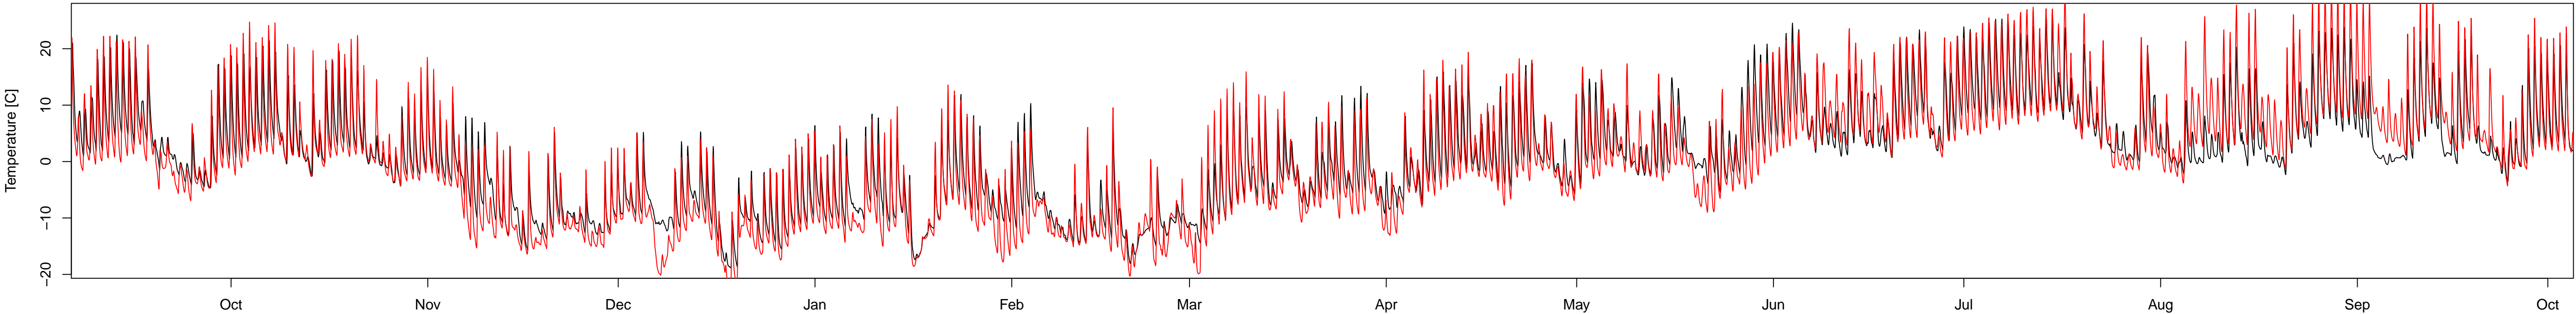

Jungfrau ridge north (black=Geotop, red=measurement, year 2005/2006)

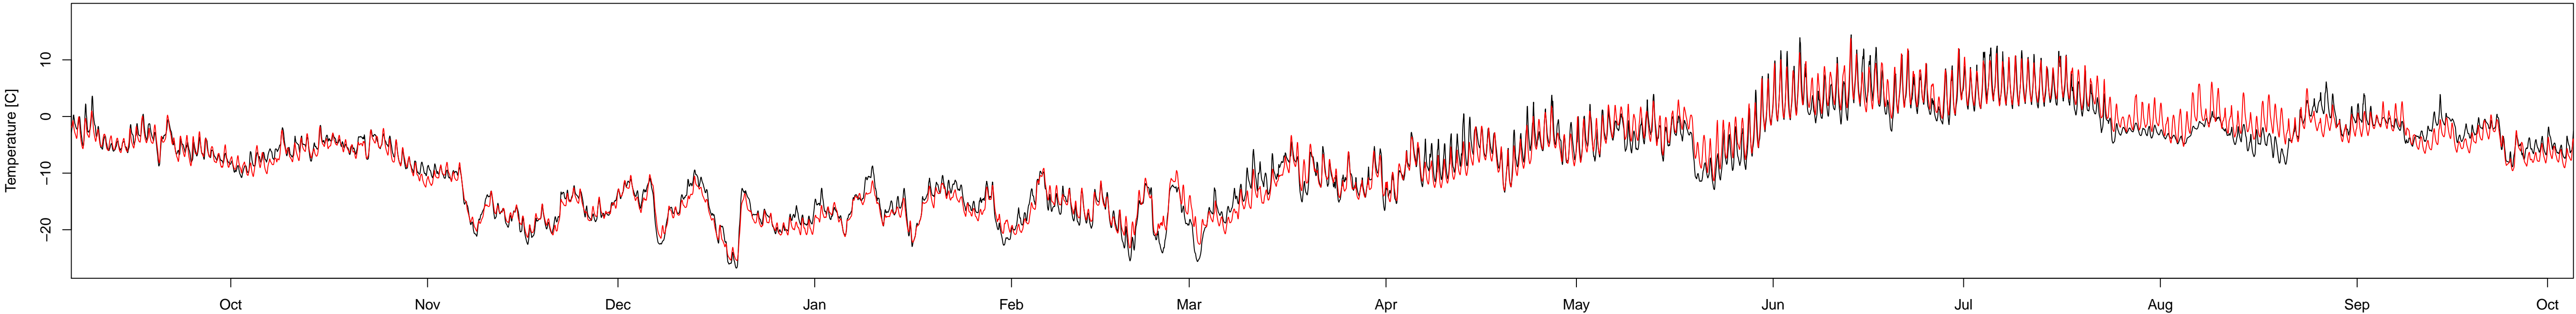

Supplement: Supplementary file 2 [file Geotop-JungfrauJoch.pdf › SupportingMaterial/Jungfraujoch/Geotop-JungfrauJoch.pdf]
