# Supplementary material for: GEOtop 2.0: simulating the combined energy and water balance at and below the land surface accounting for soil freezing, snow cover and terrain effects
Source: Copernicus journal article supplement (doi:10.5194/gmd-7-2831-2014), 2014-12-03
Supplement: Supplementary file 3 [file gmd-7-2831-2014-supplement-cover-letter.pdf › gmd-7-2831-2014-supplement-cover-letter.pdf]

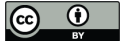

## *Supplement of*

# **GEOtop 2.0: simulating the combined energy and water balance at and below the land surface accounting for soil freezing, snow cover and terrain effects**

**S. Endrizzi et al.**

*Correspondence to:* S. Endrizzi (stefano.end@gmail.com)

- gmd-7-2831-2014-supplement-cover-letter.pdf
- SupportingMaterial
  - .DS\_Store
  - ColDePorte
    - \* Geotop-ColDePorte.pdf
    - \* geotop.inpts
  - Double hillslope
    - \* dem.asc
    - \* geotop.inpts
  - JungfrauJoch
    - \* Geotop-JungfrauJoch.pdf
    - \* geotop.inpts
- \_\_MACOSX
  - .\_SupportingMaterial
  - SupportingMaterial
    - \* .\_DS\_Store
    - \* ColDePorte
    - \* Double hillslope
    - \* JungfrauJoch
