# Supplementary figures and images for: GEOtop 2.0: simulating the combined energy and water balance at and below the land surface accounting for soil freezing, snow cover and terrain effects
Source: Copernicus journal article supplement (doi:10.5194/gmd-7-2831-2014), 2014-12-03

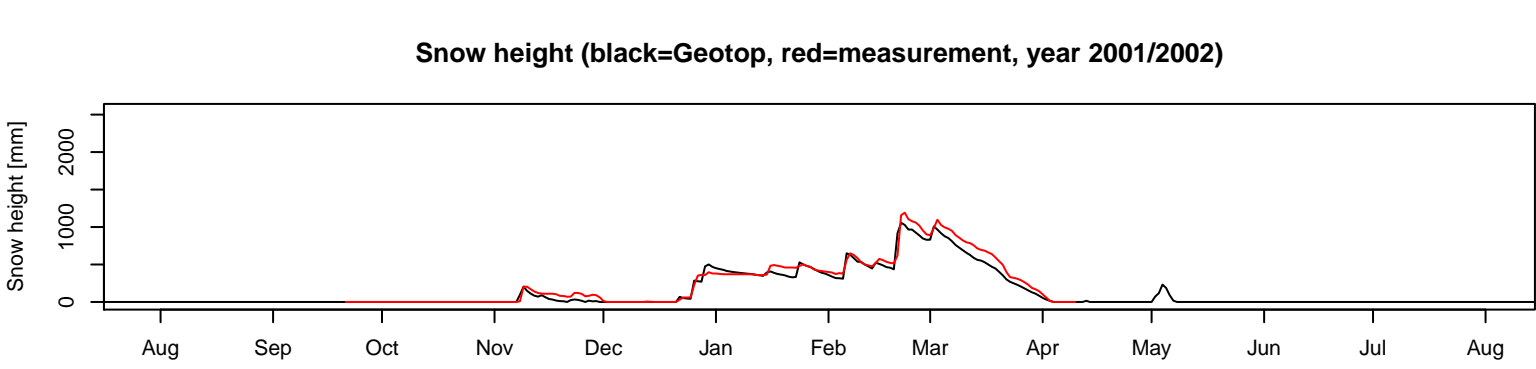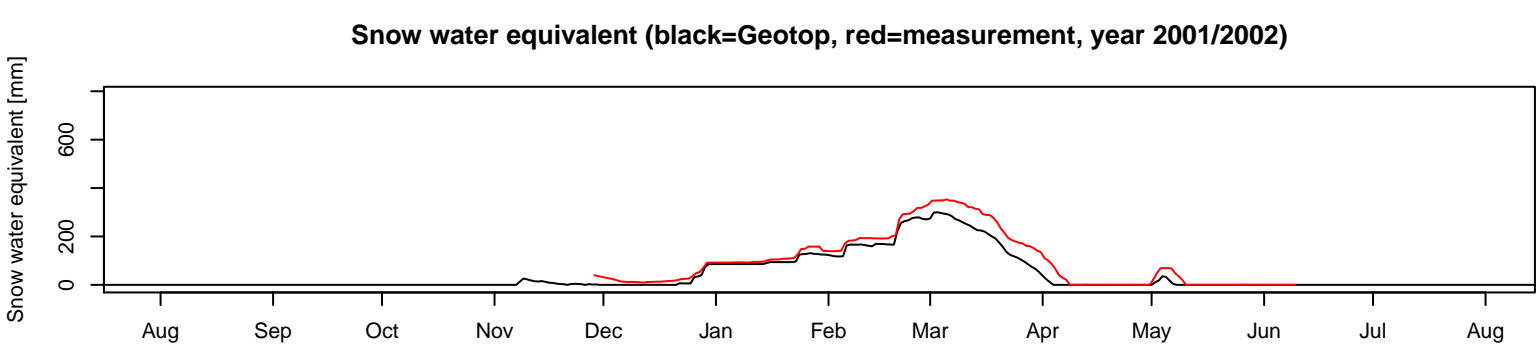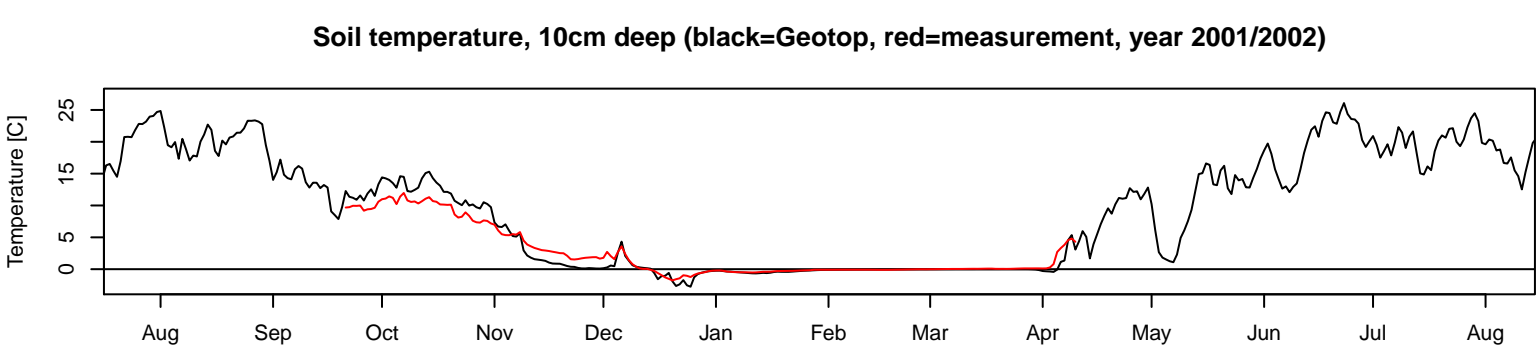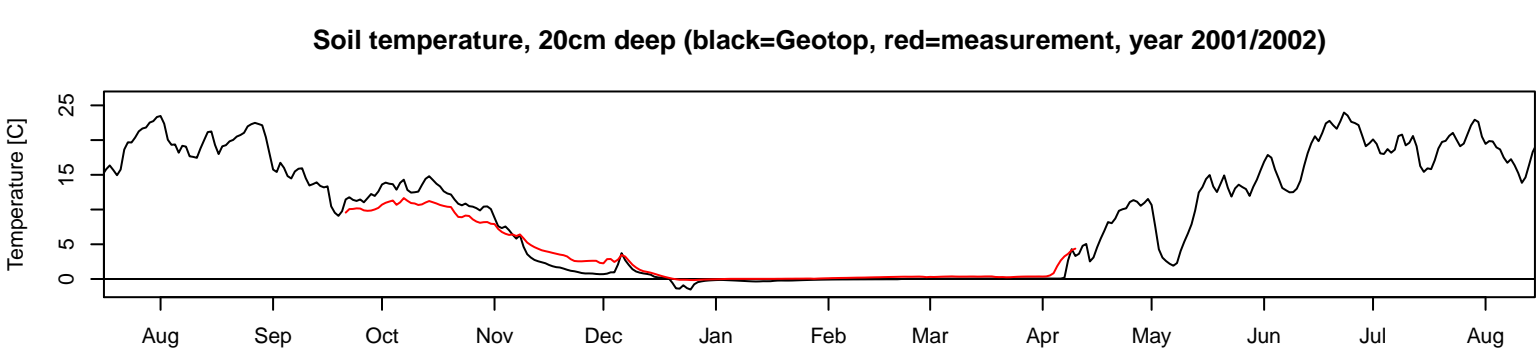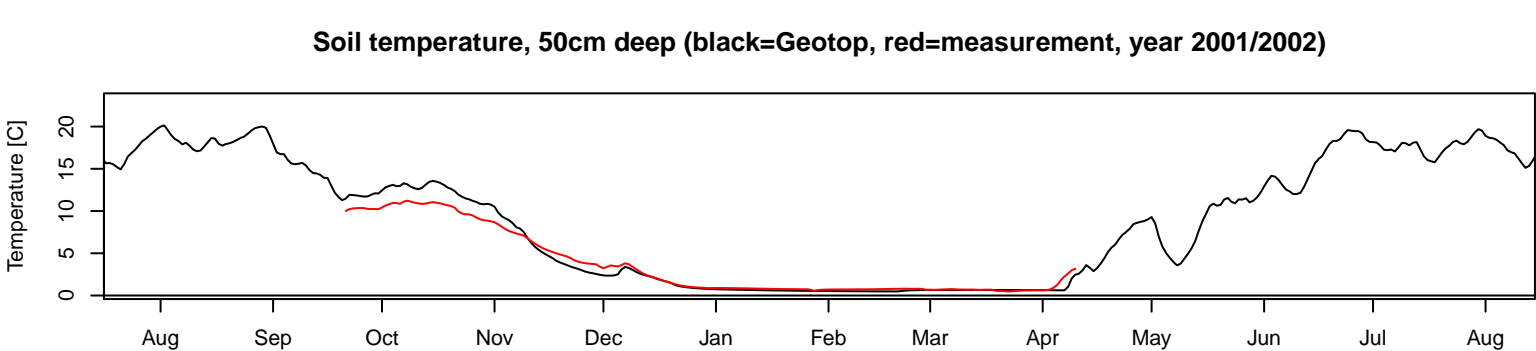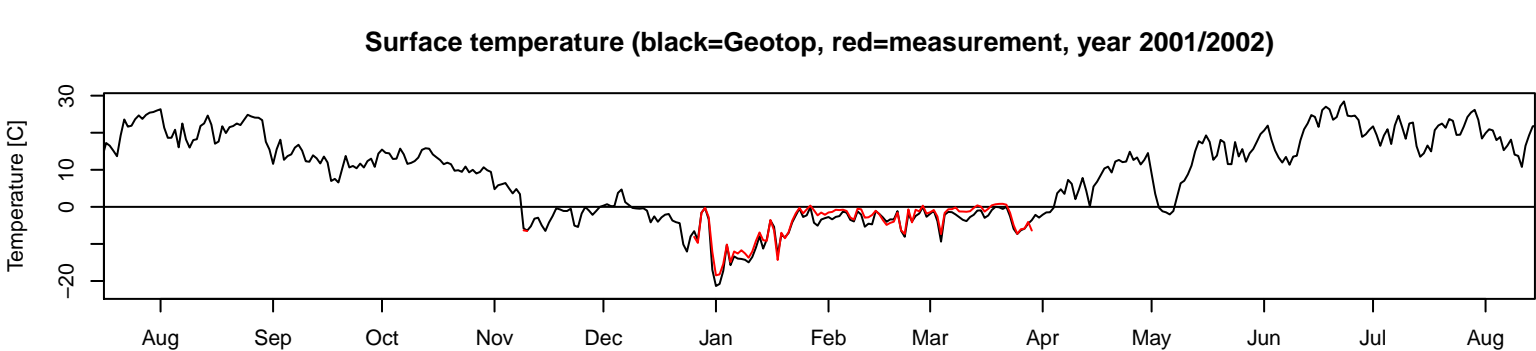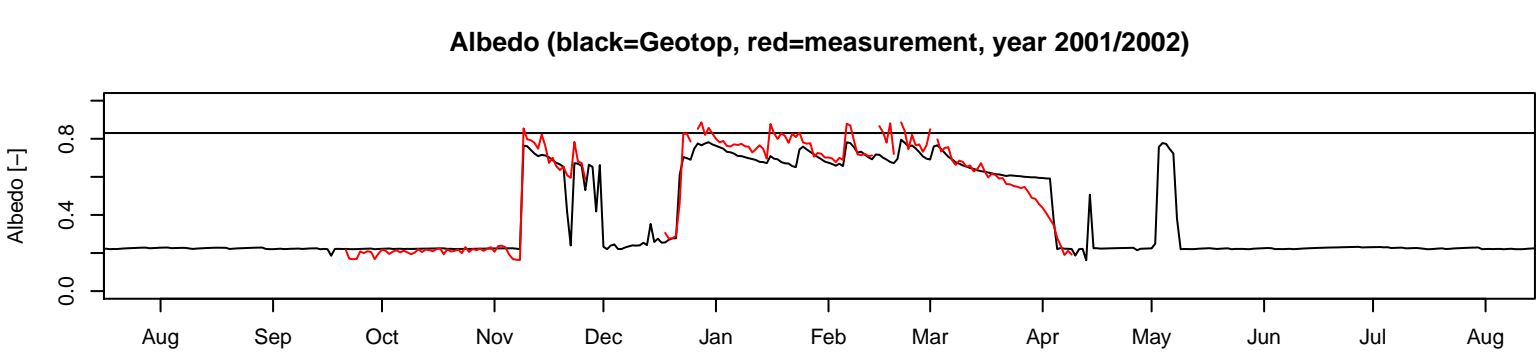

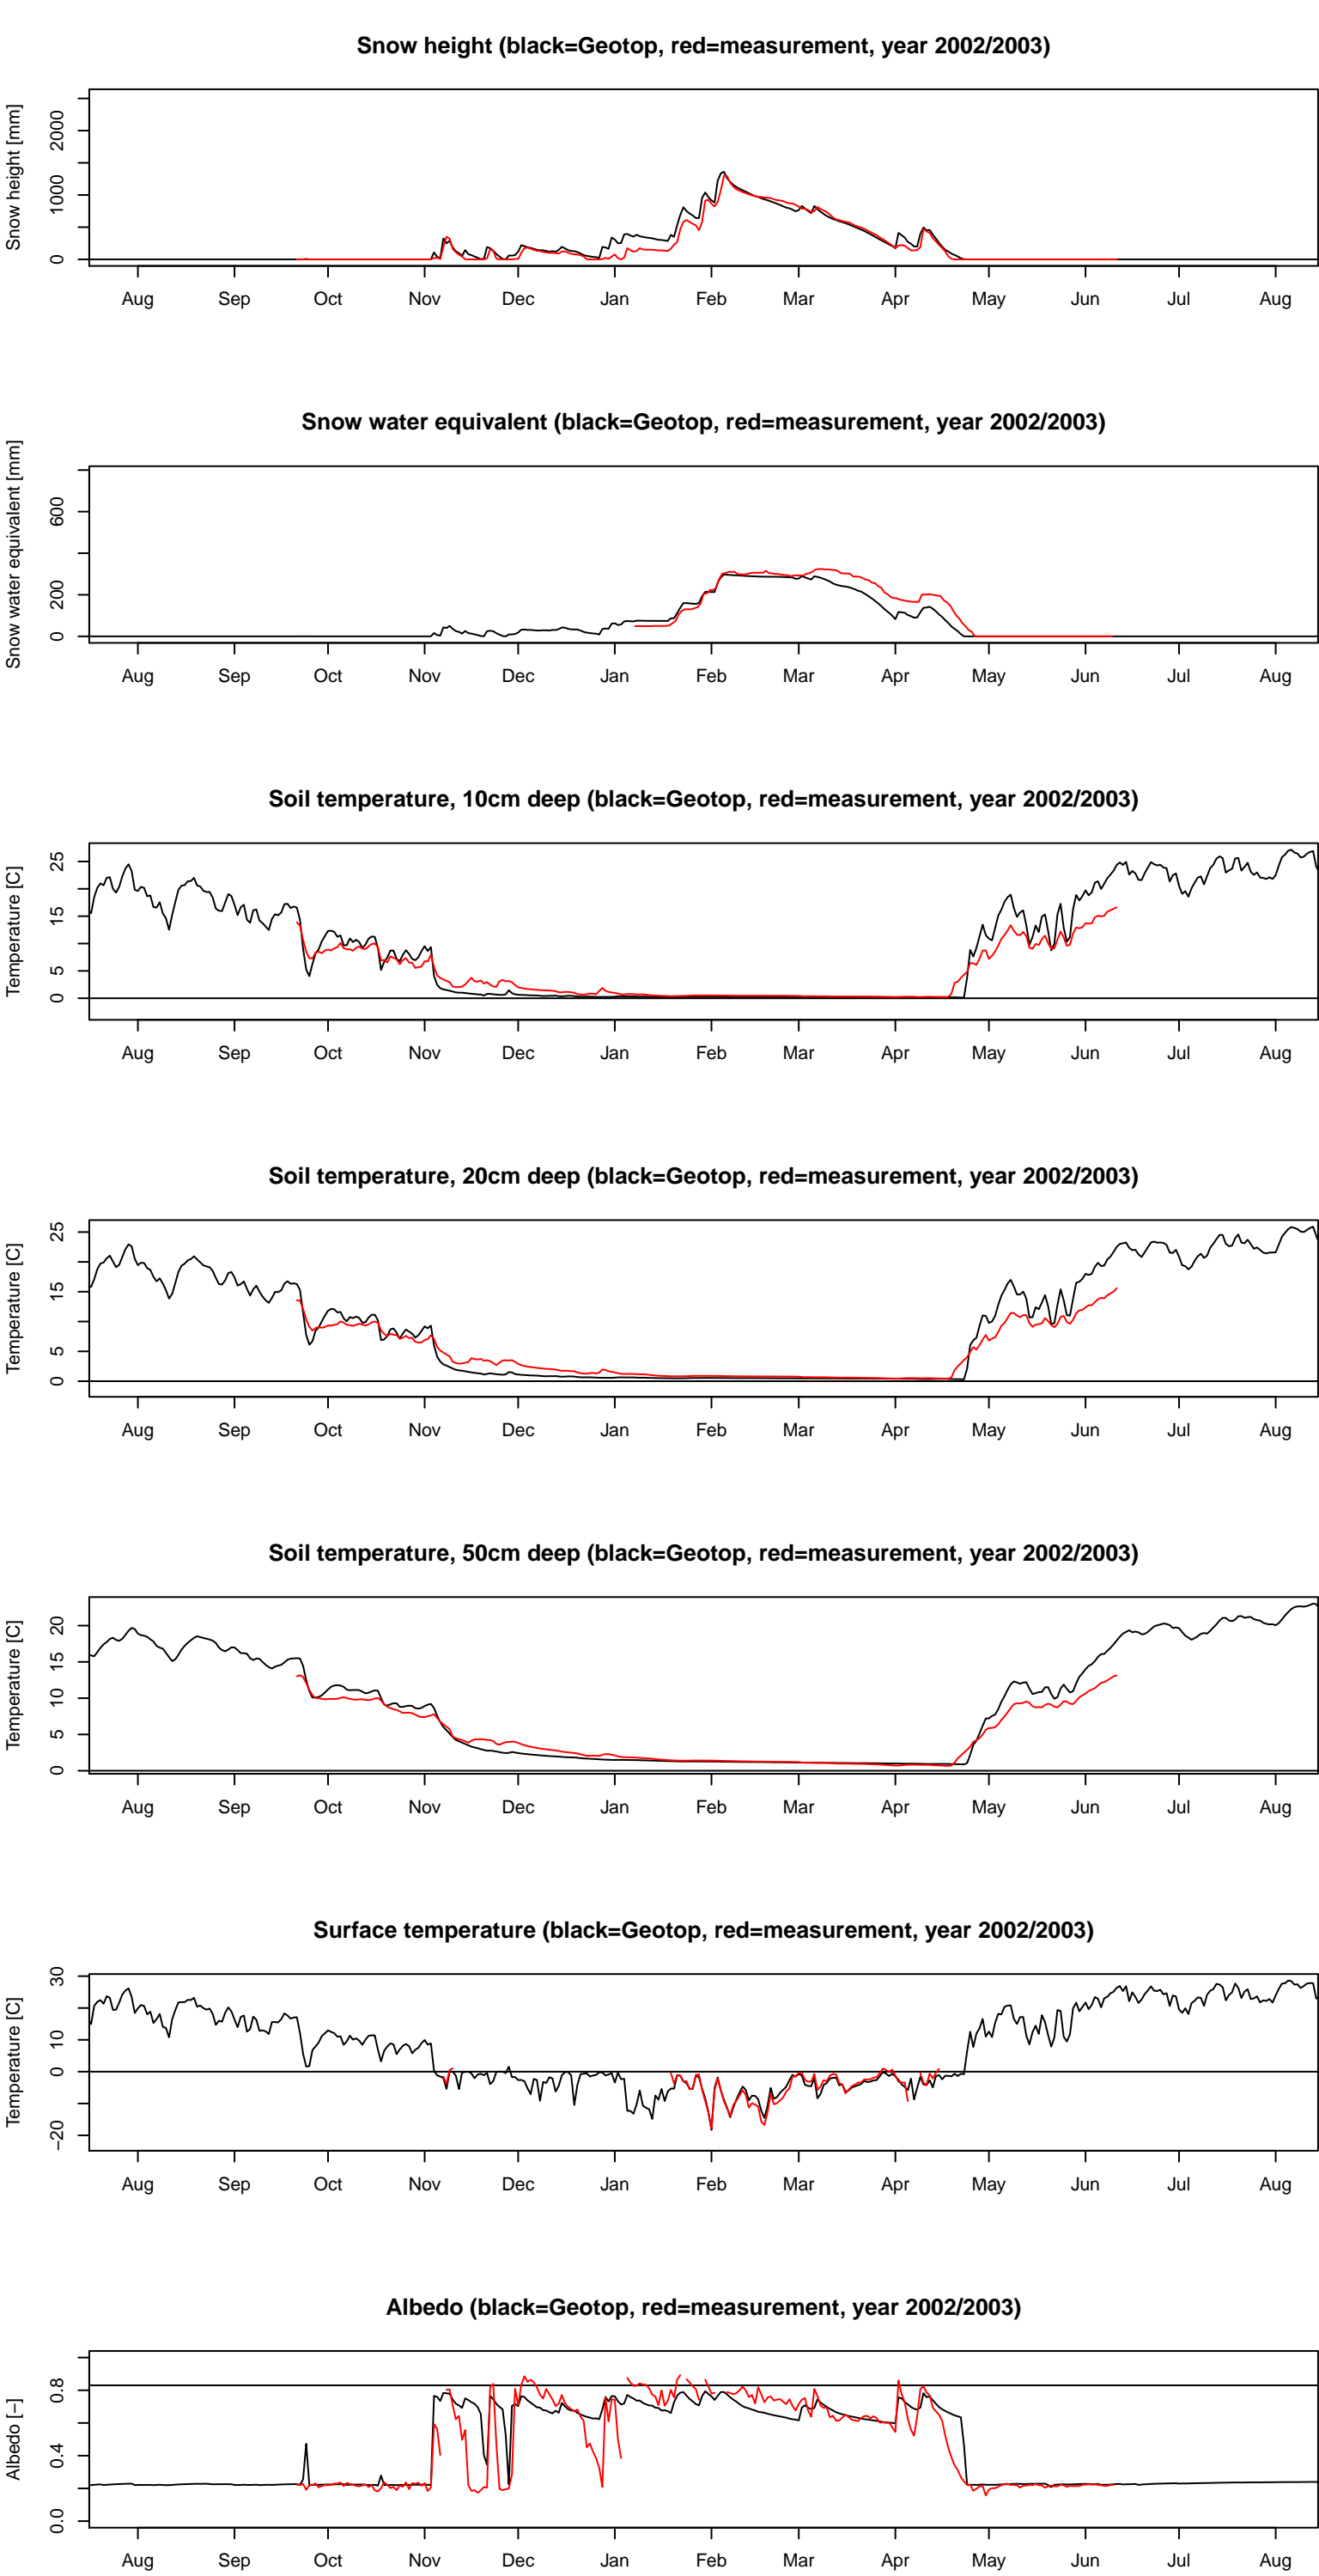

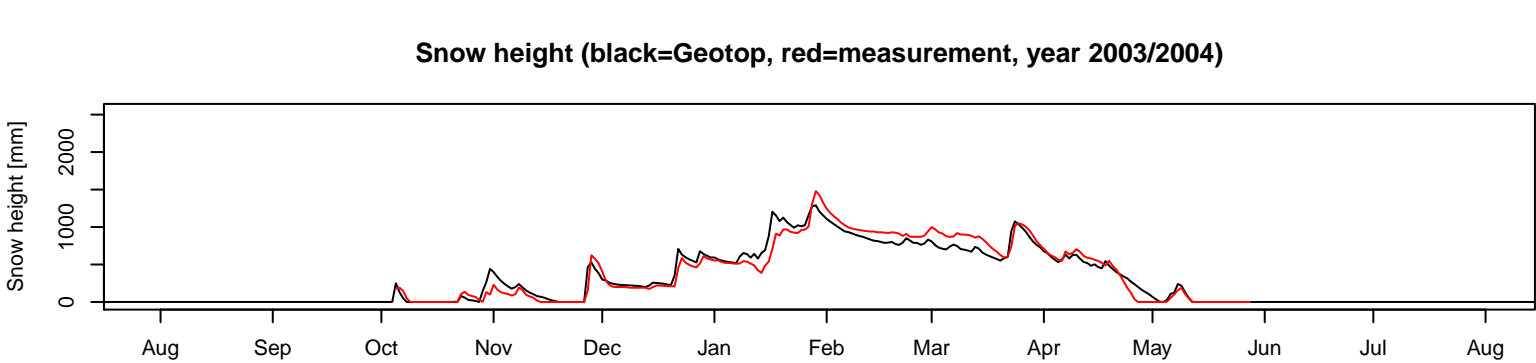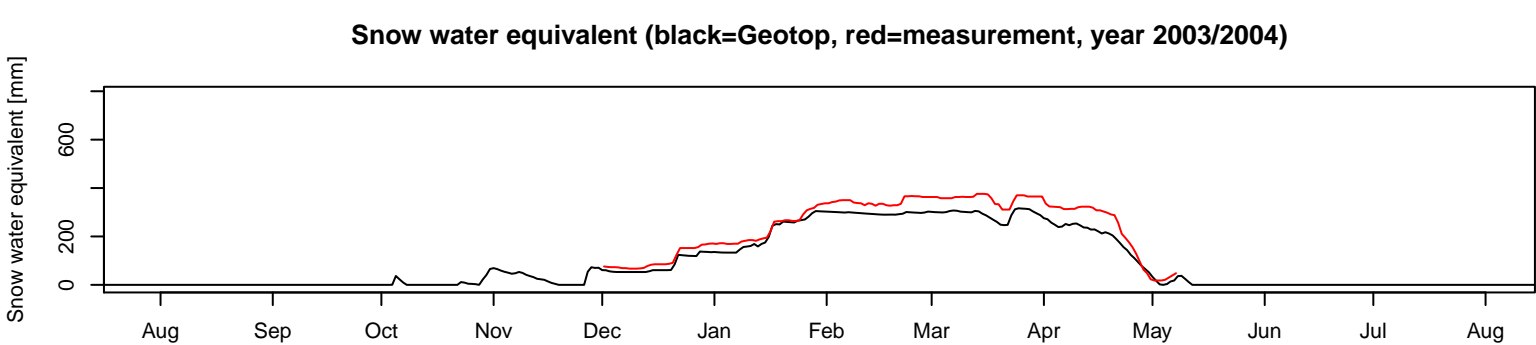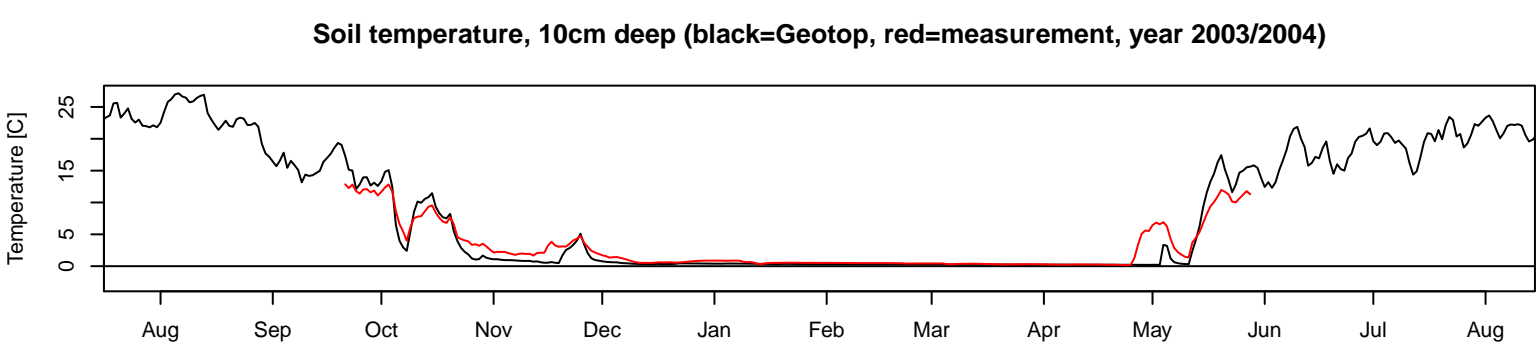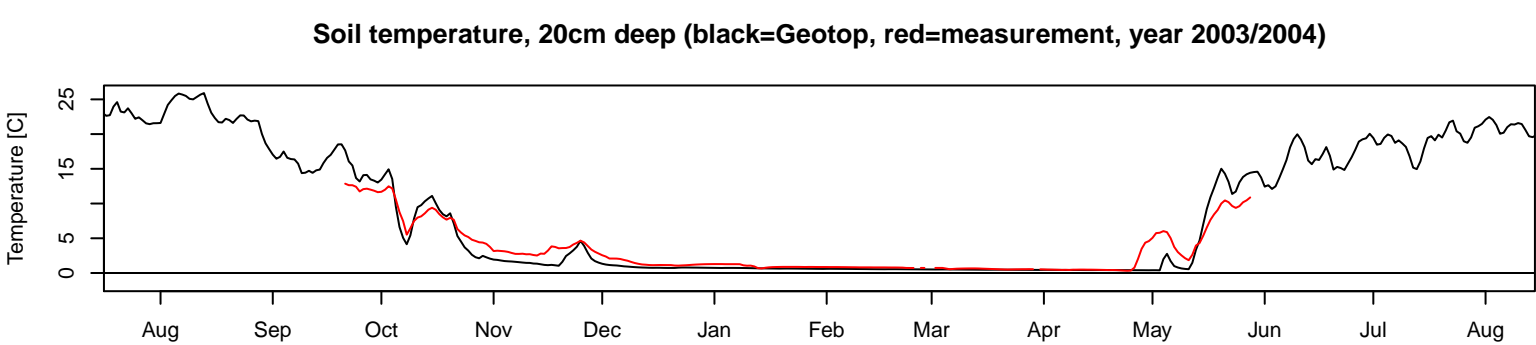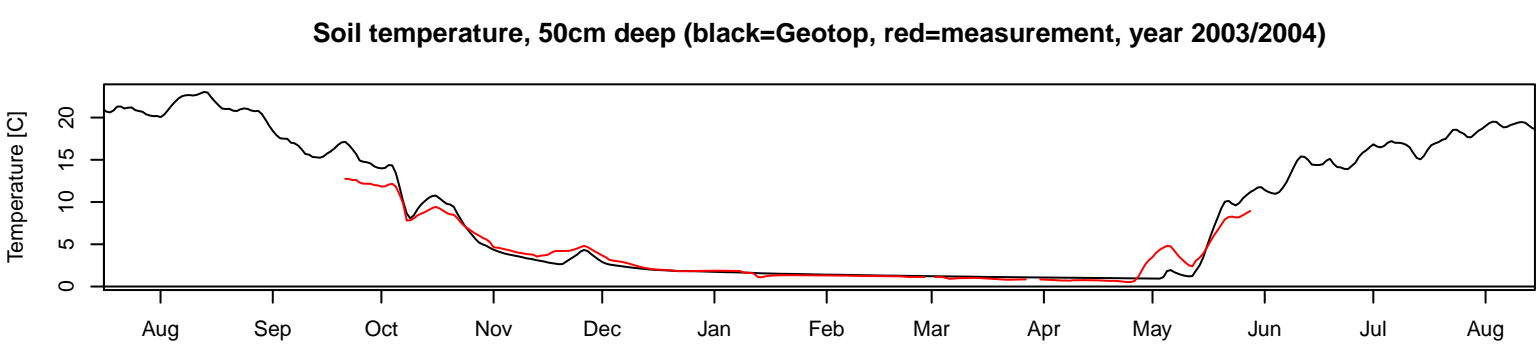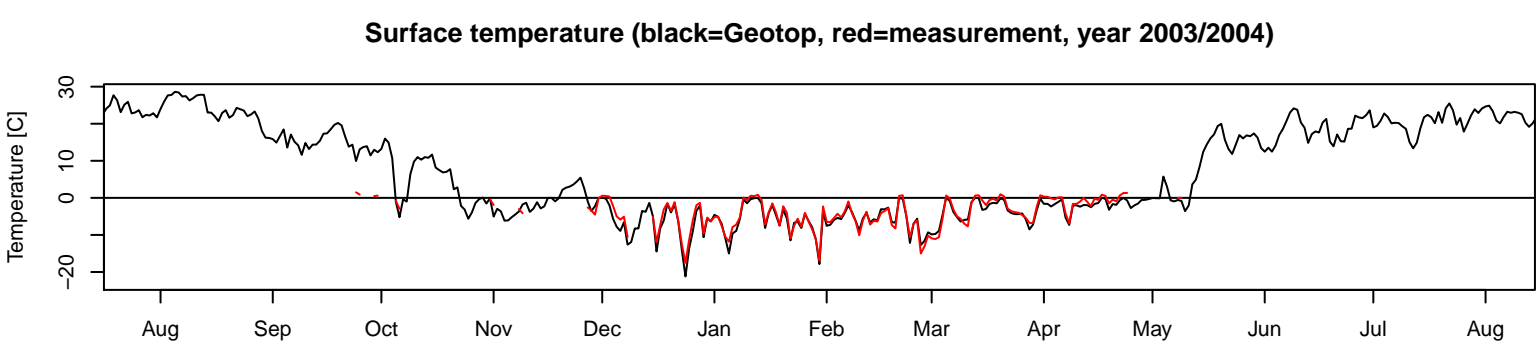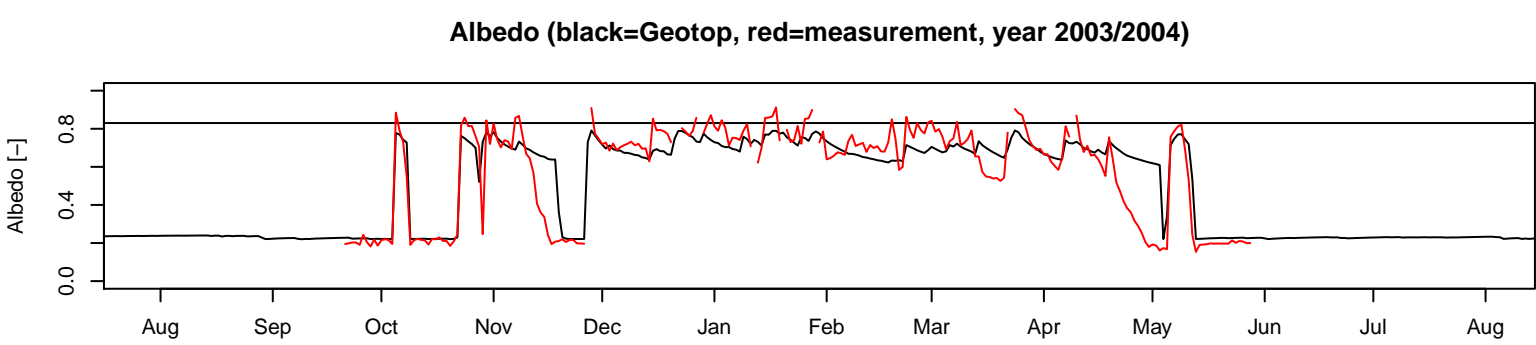

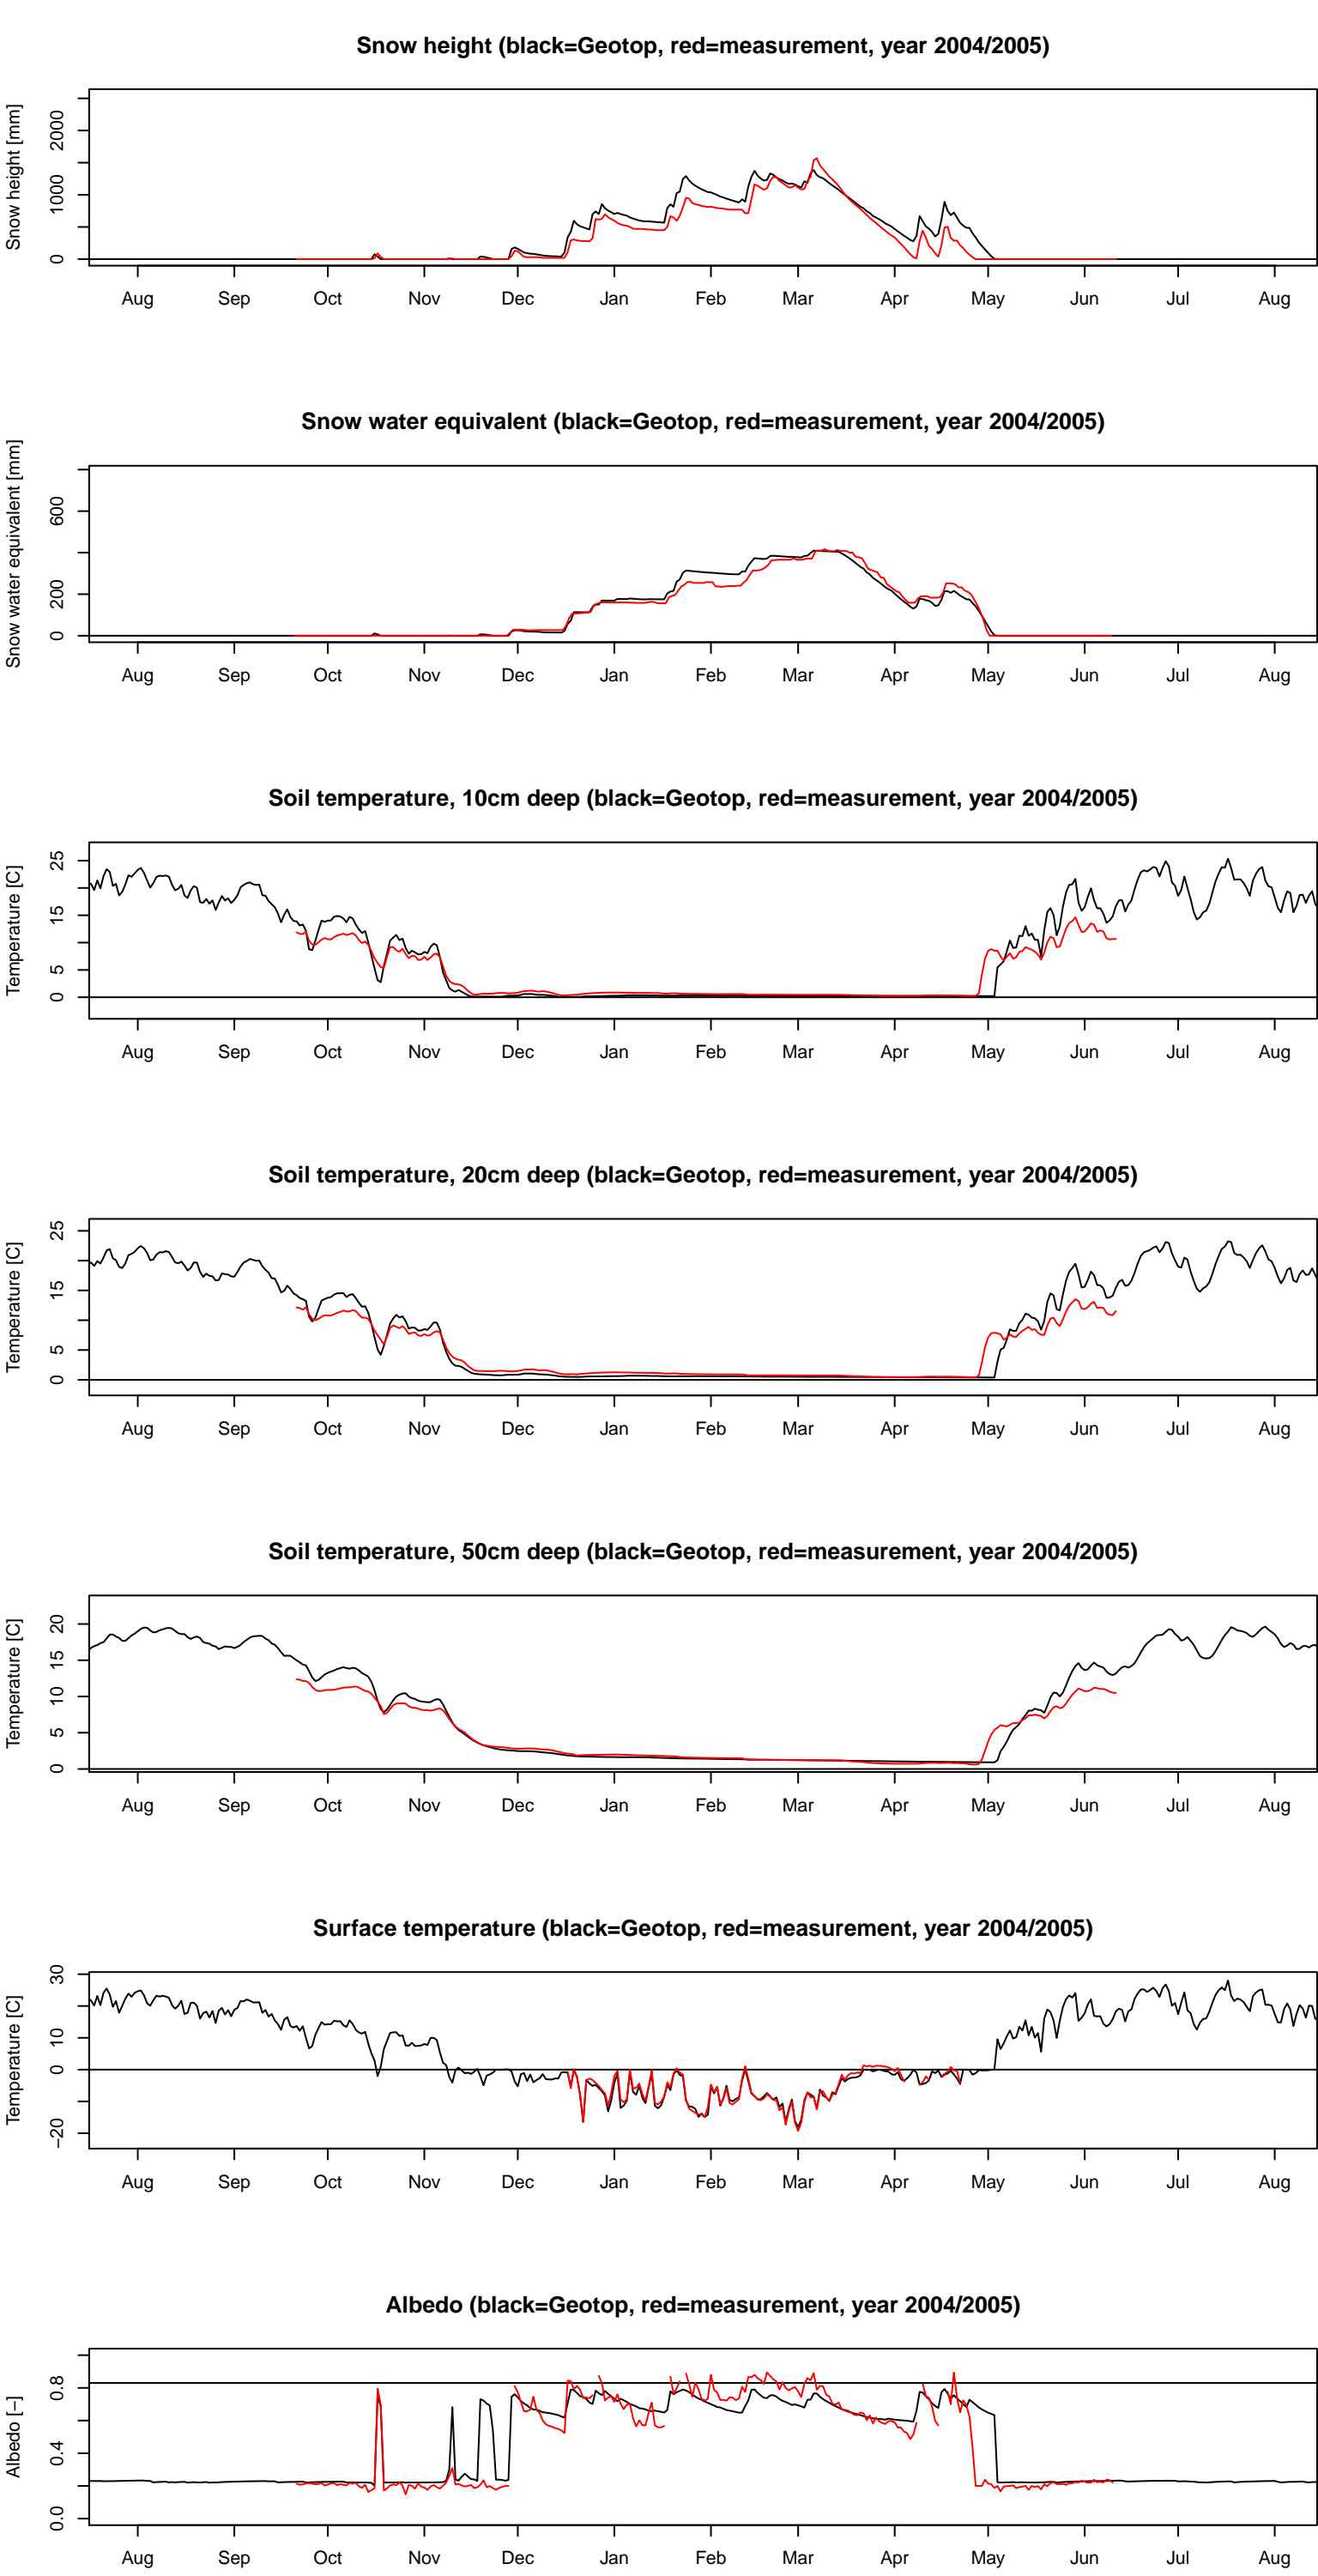

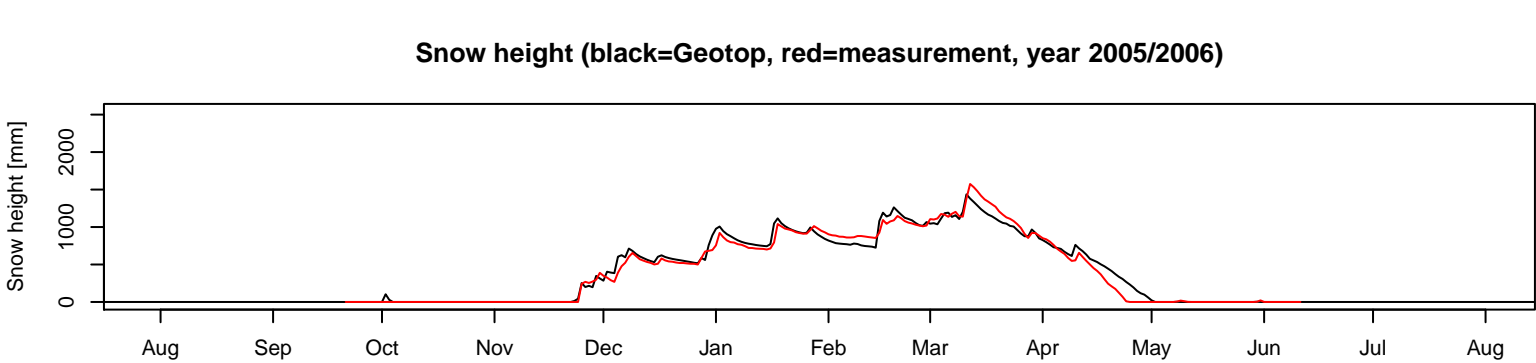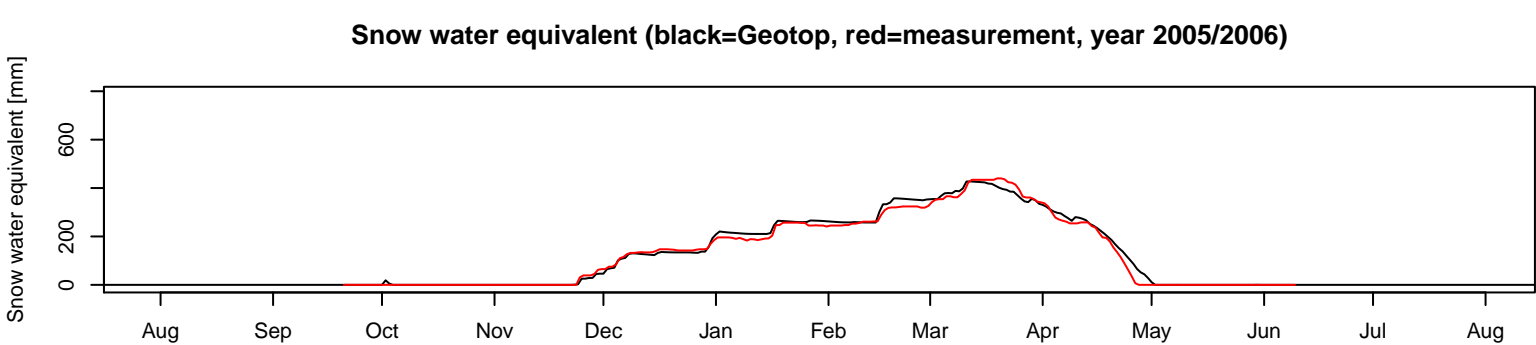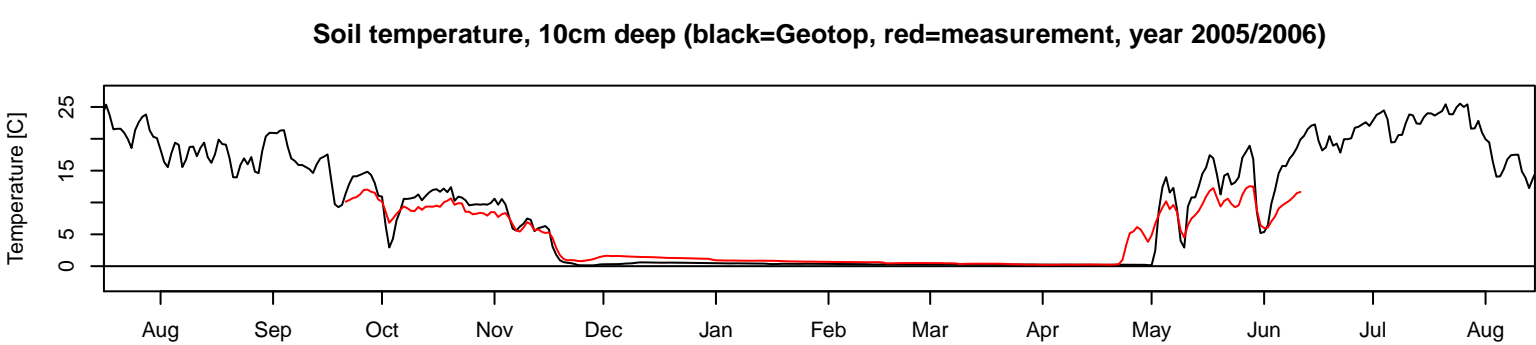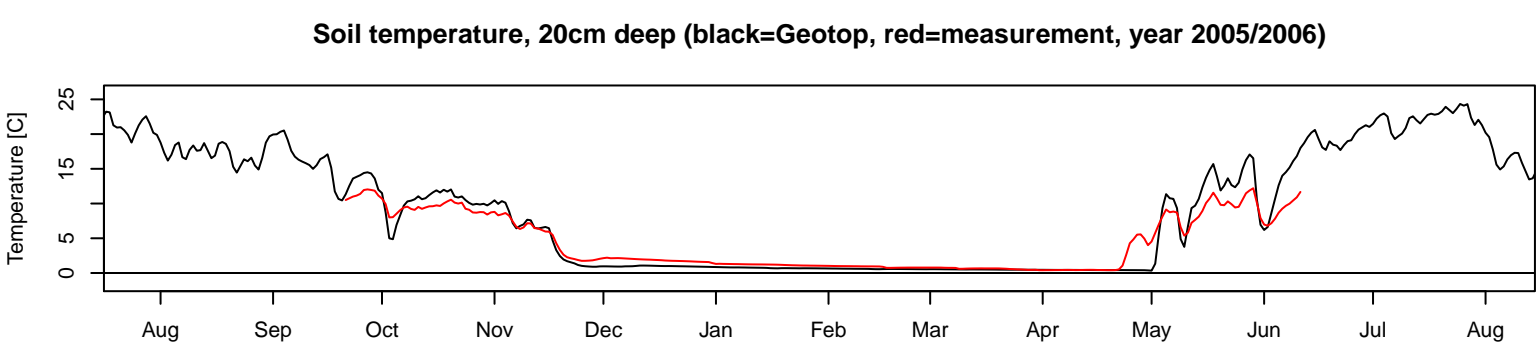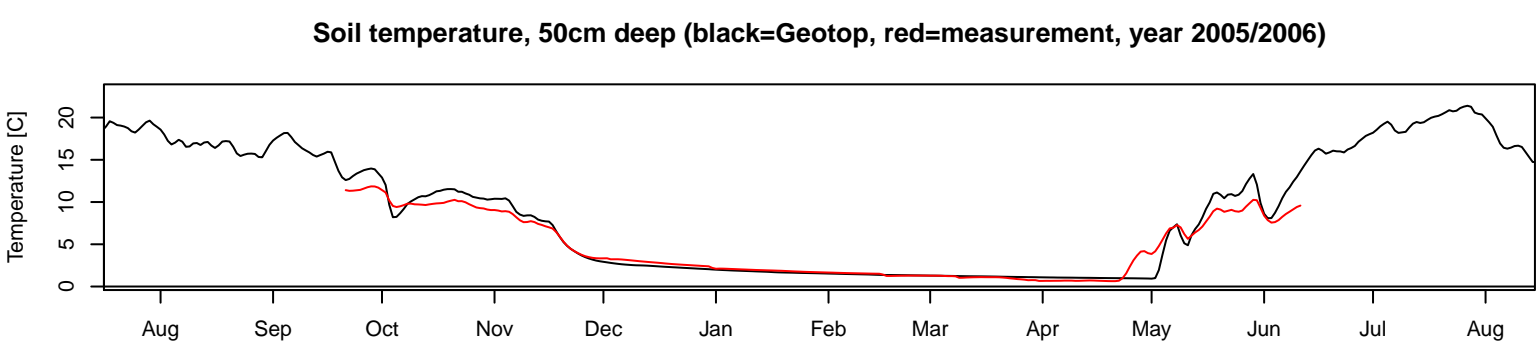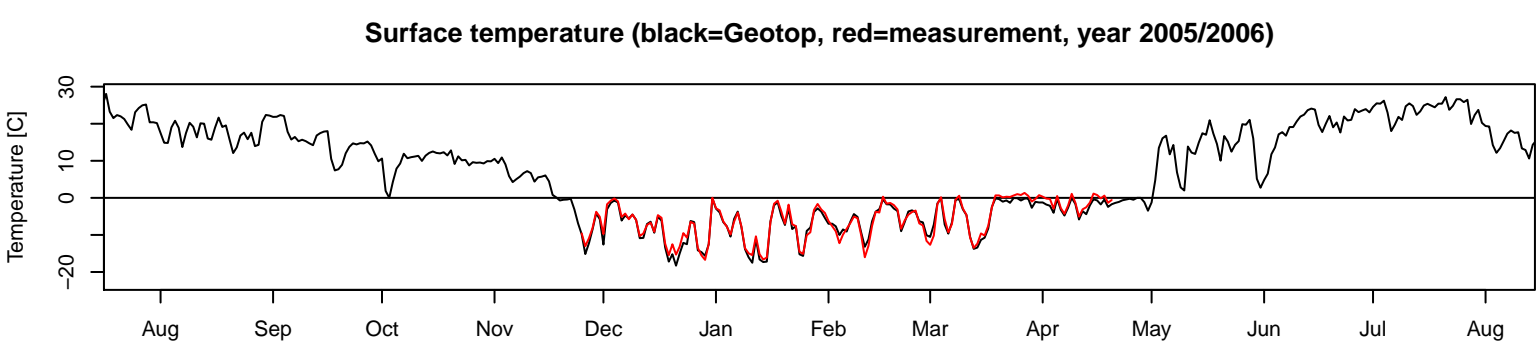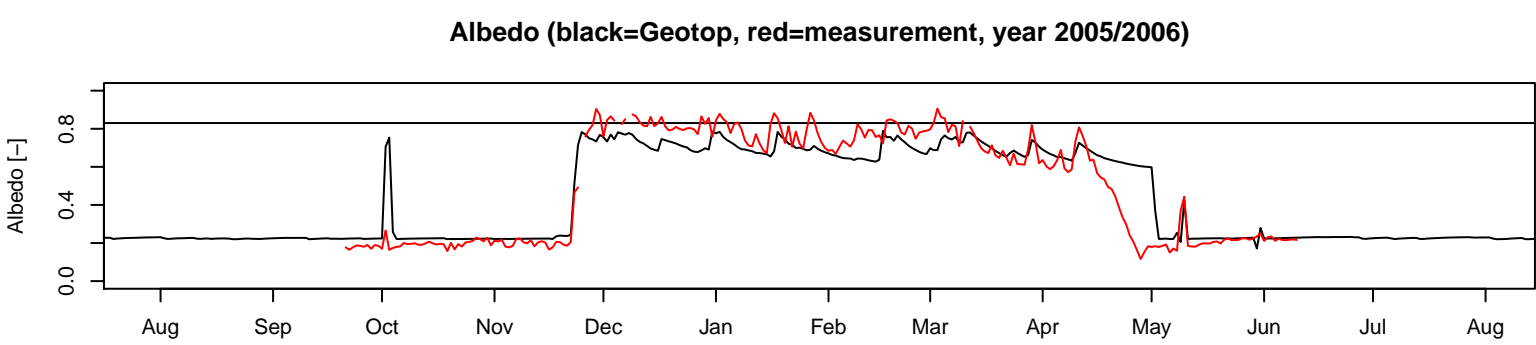

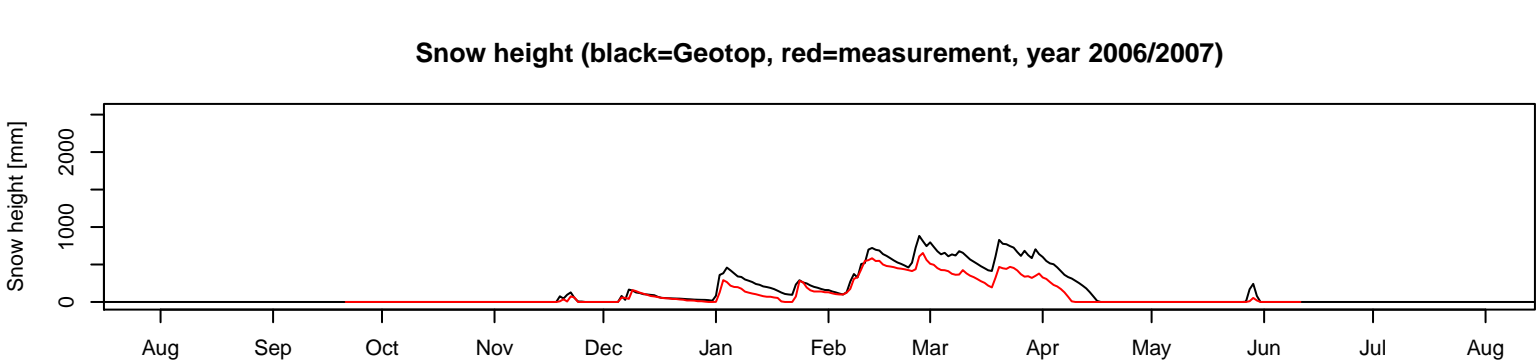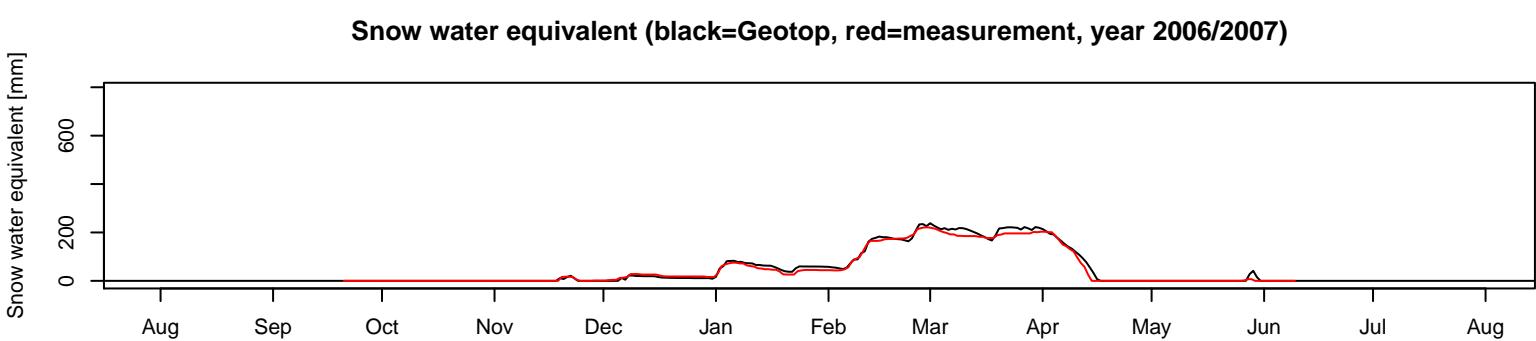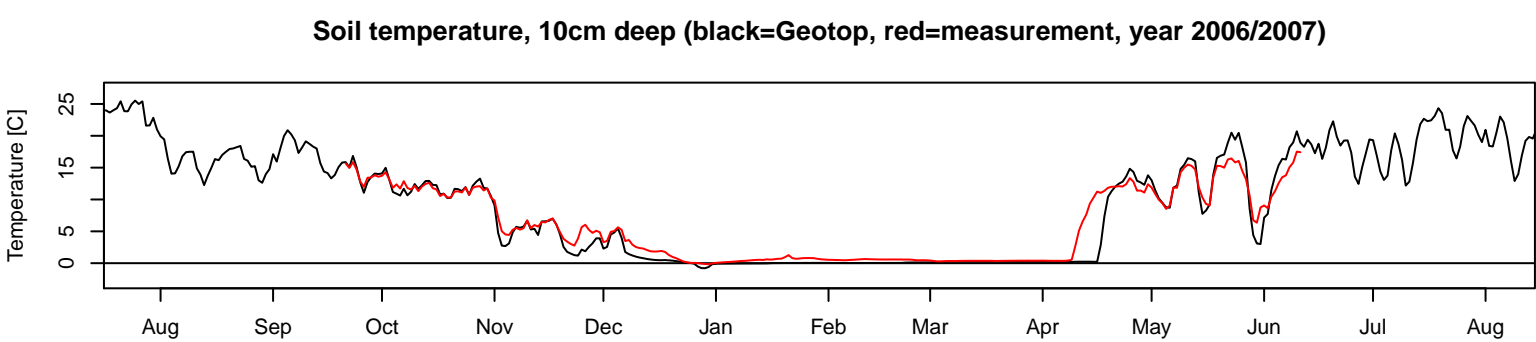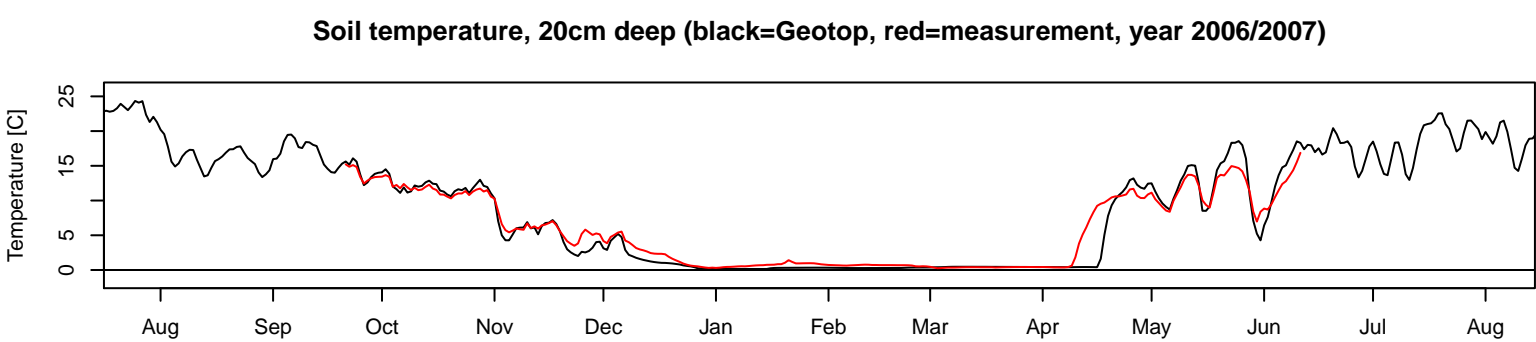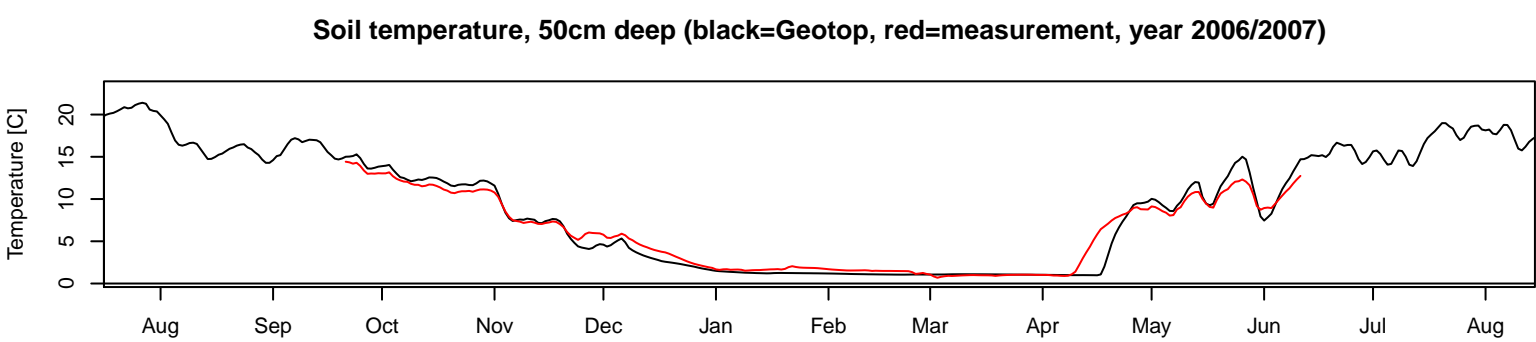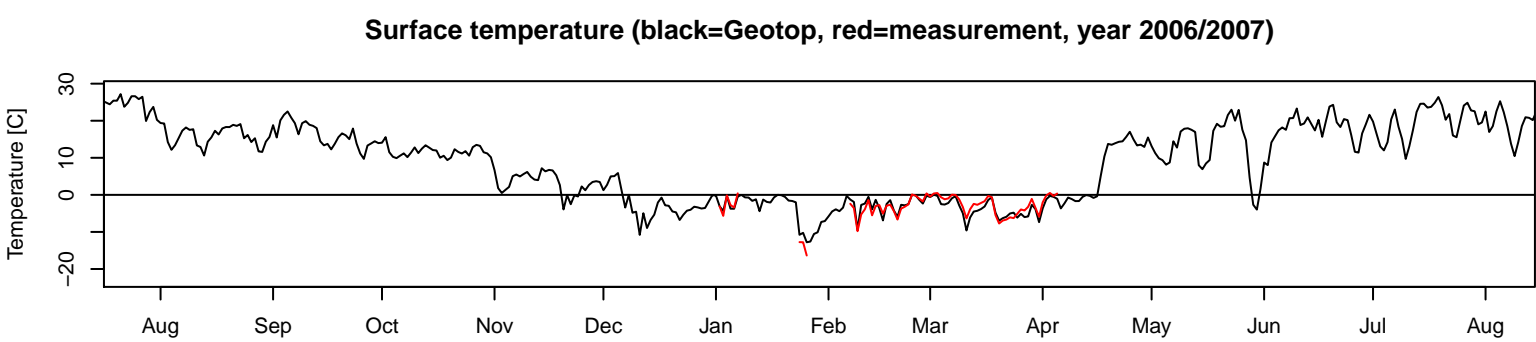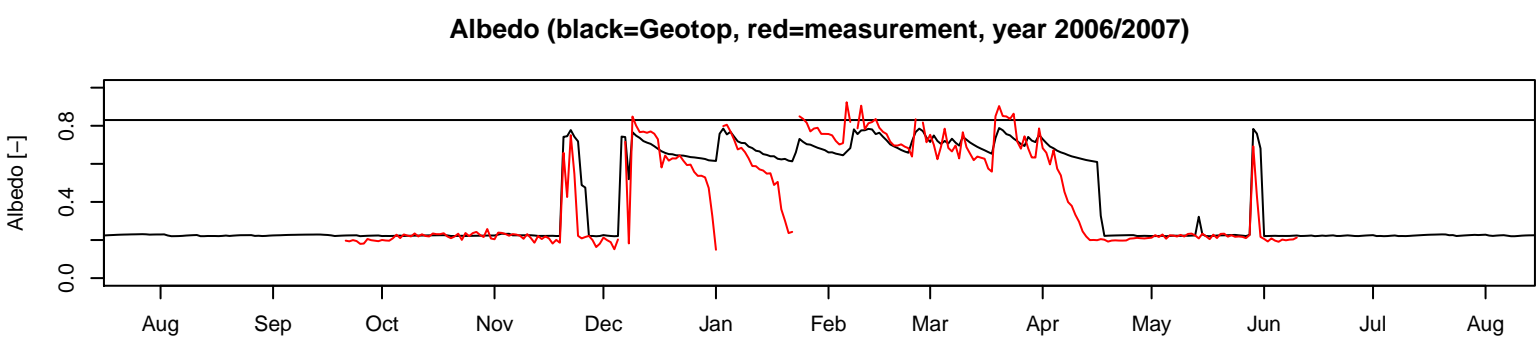

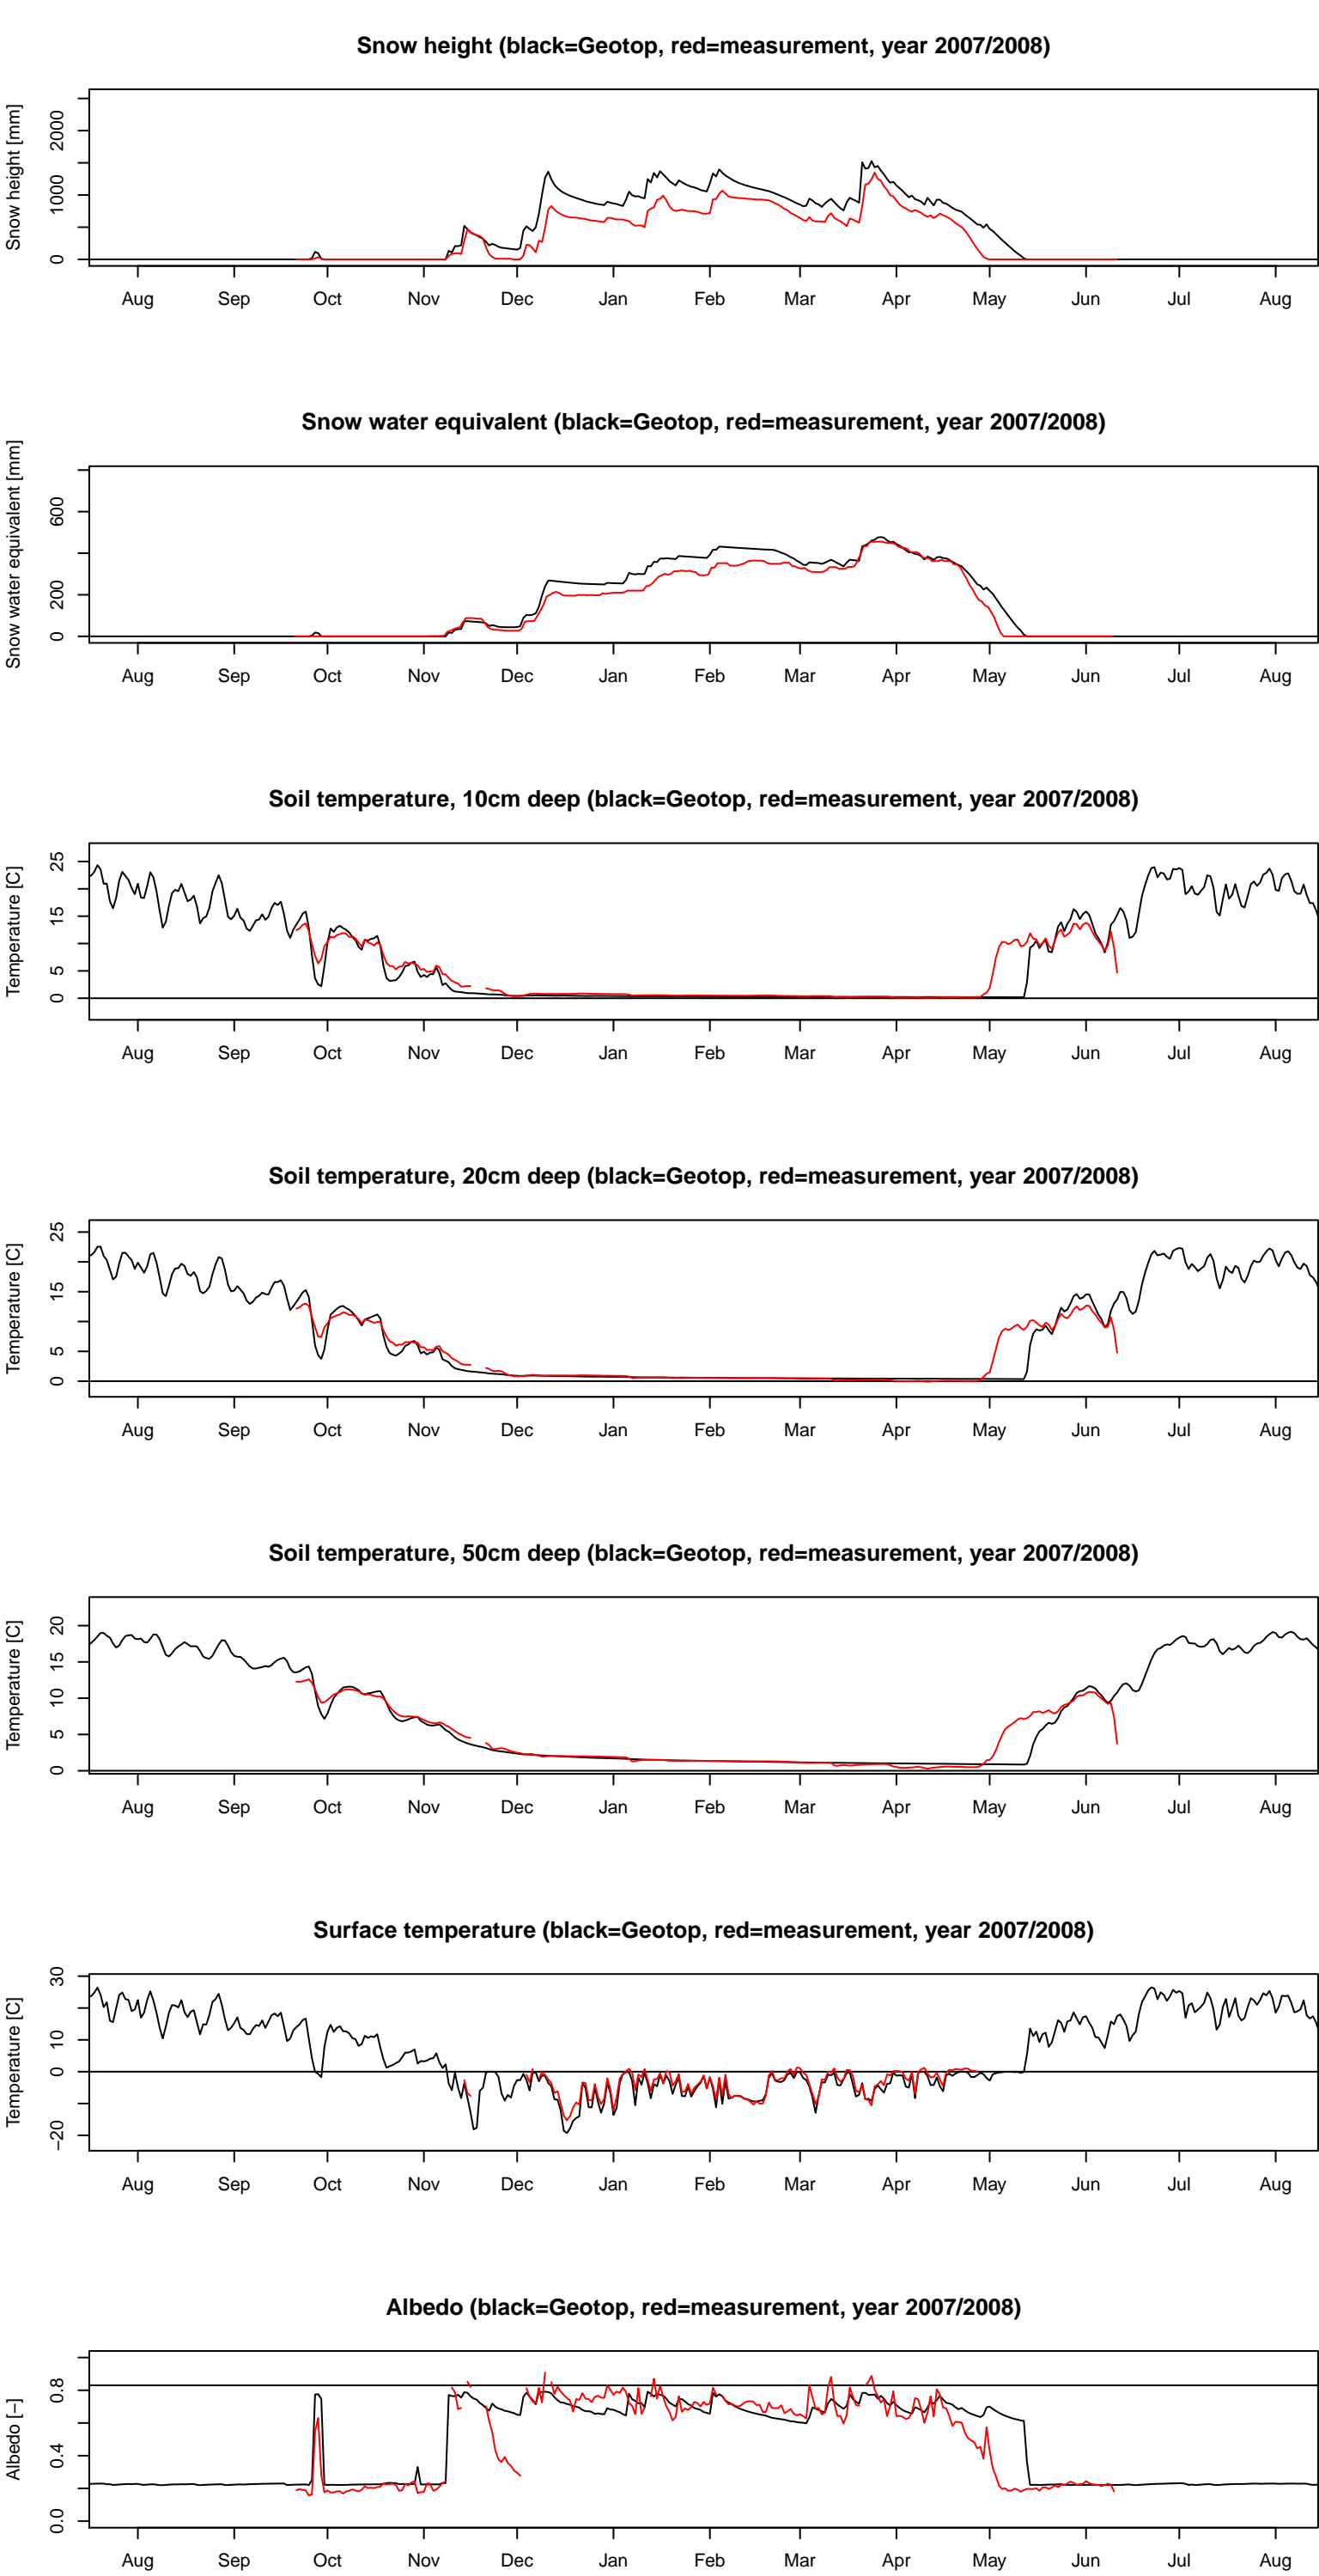

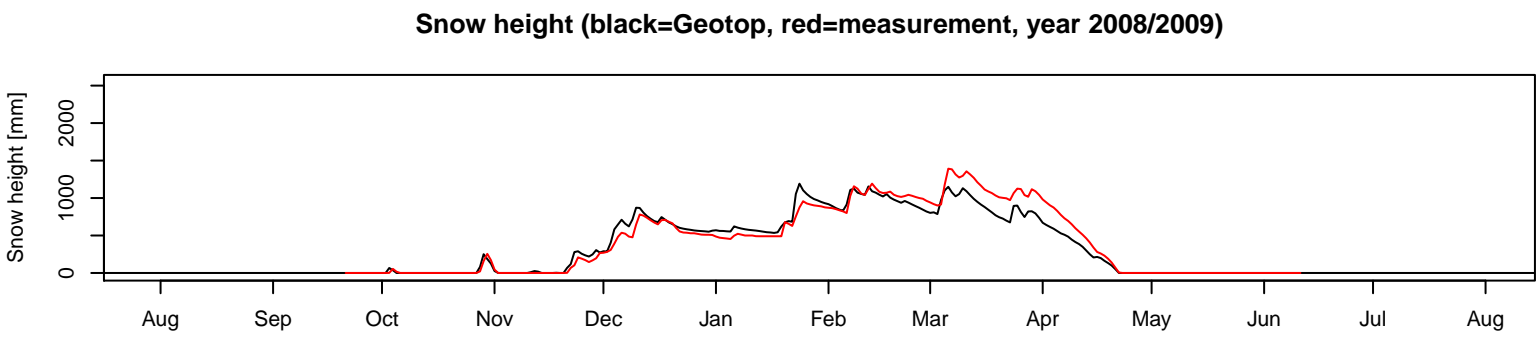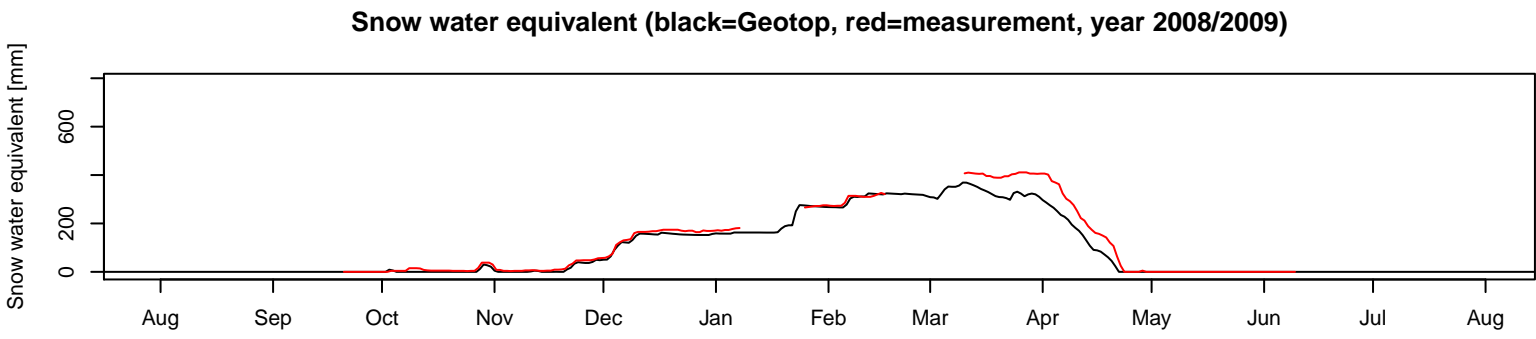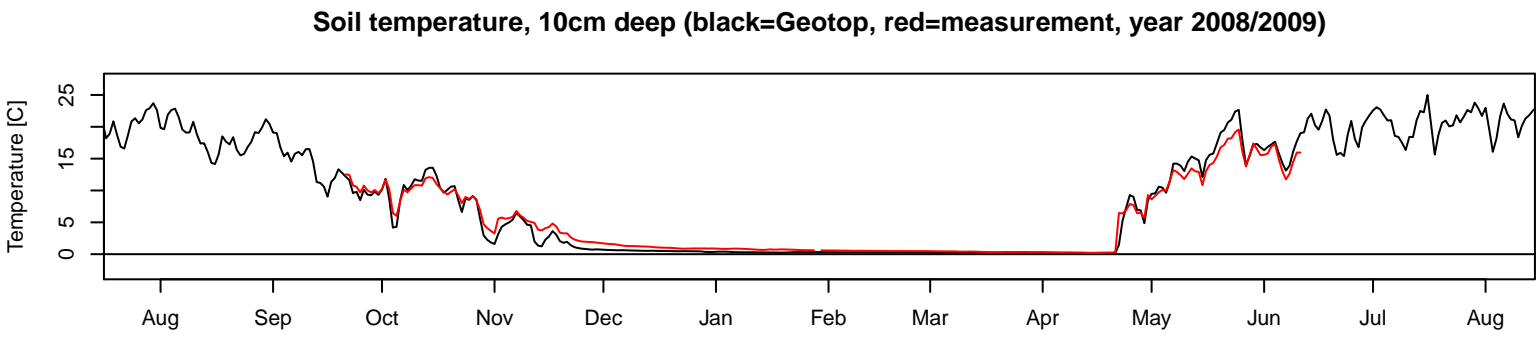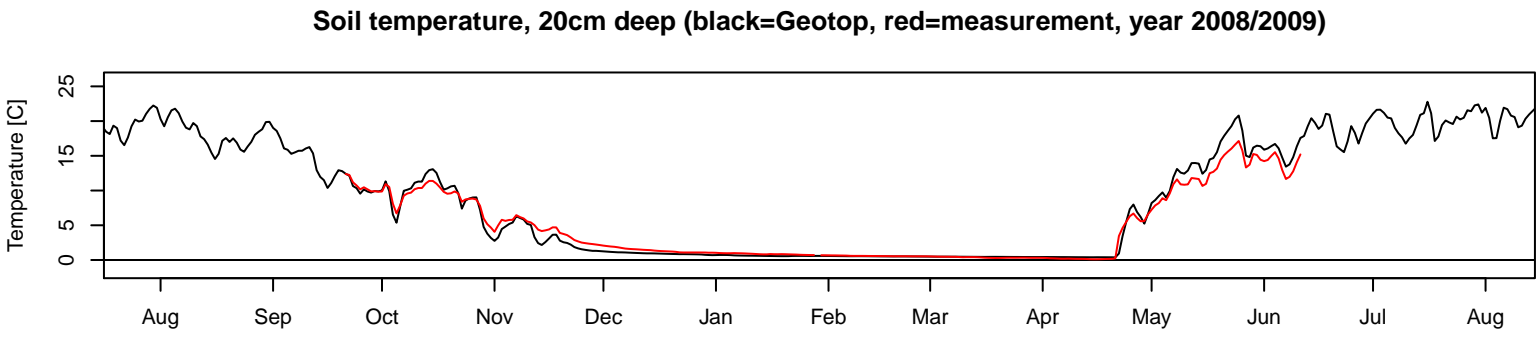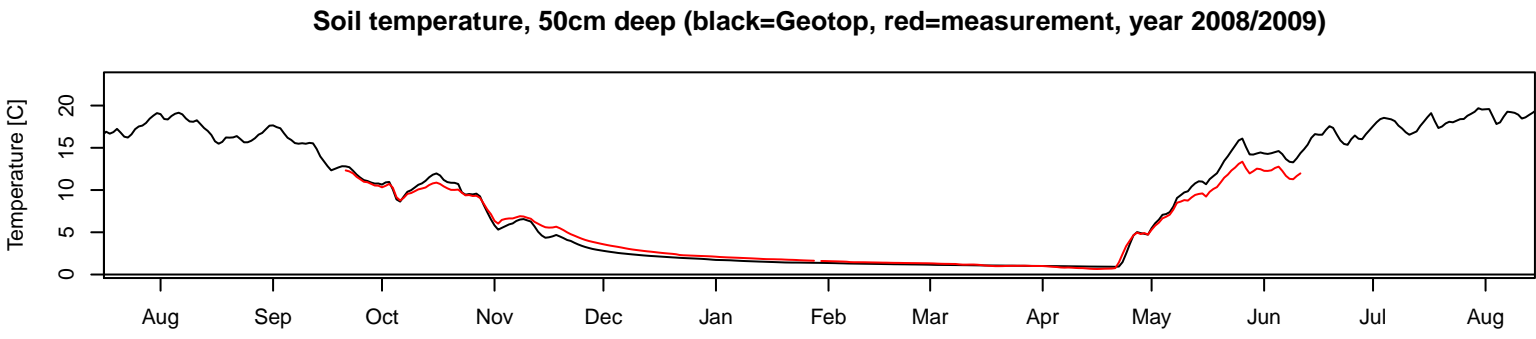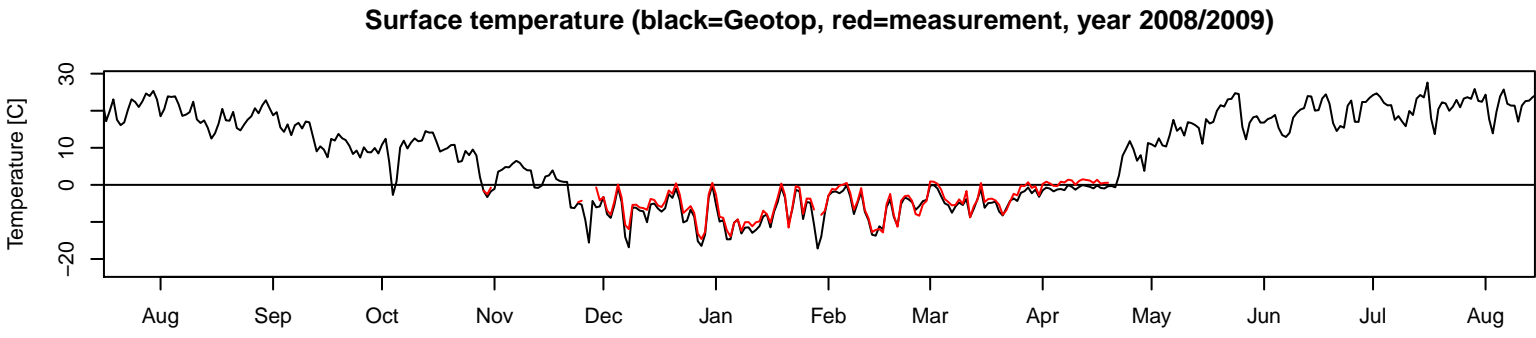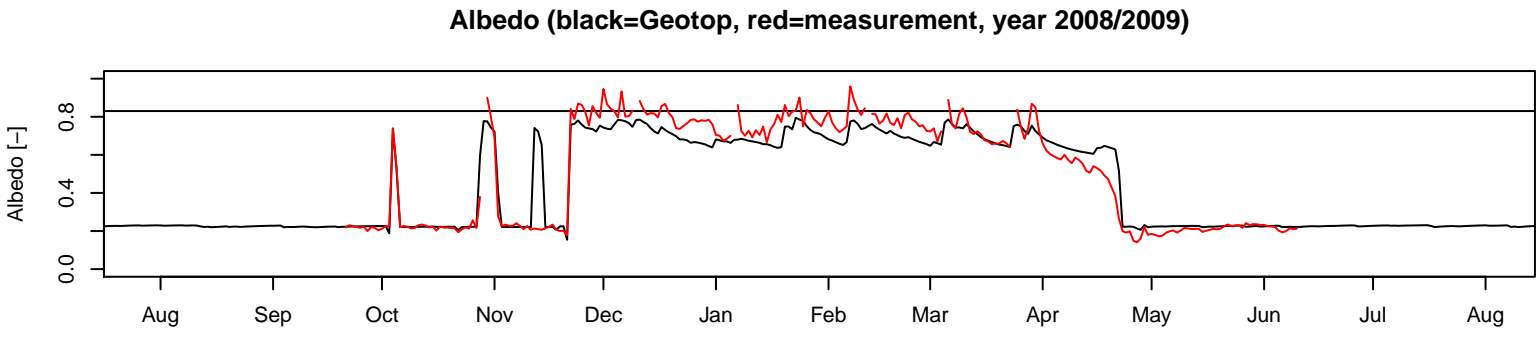



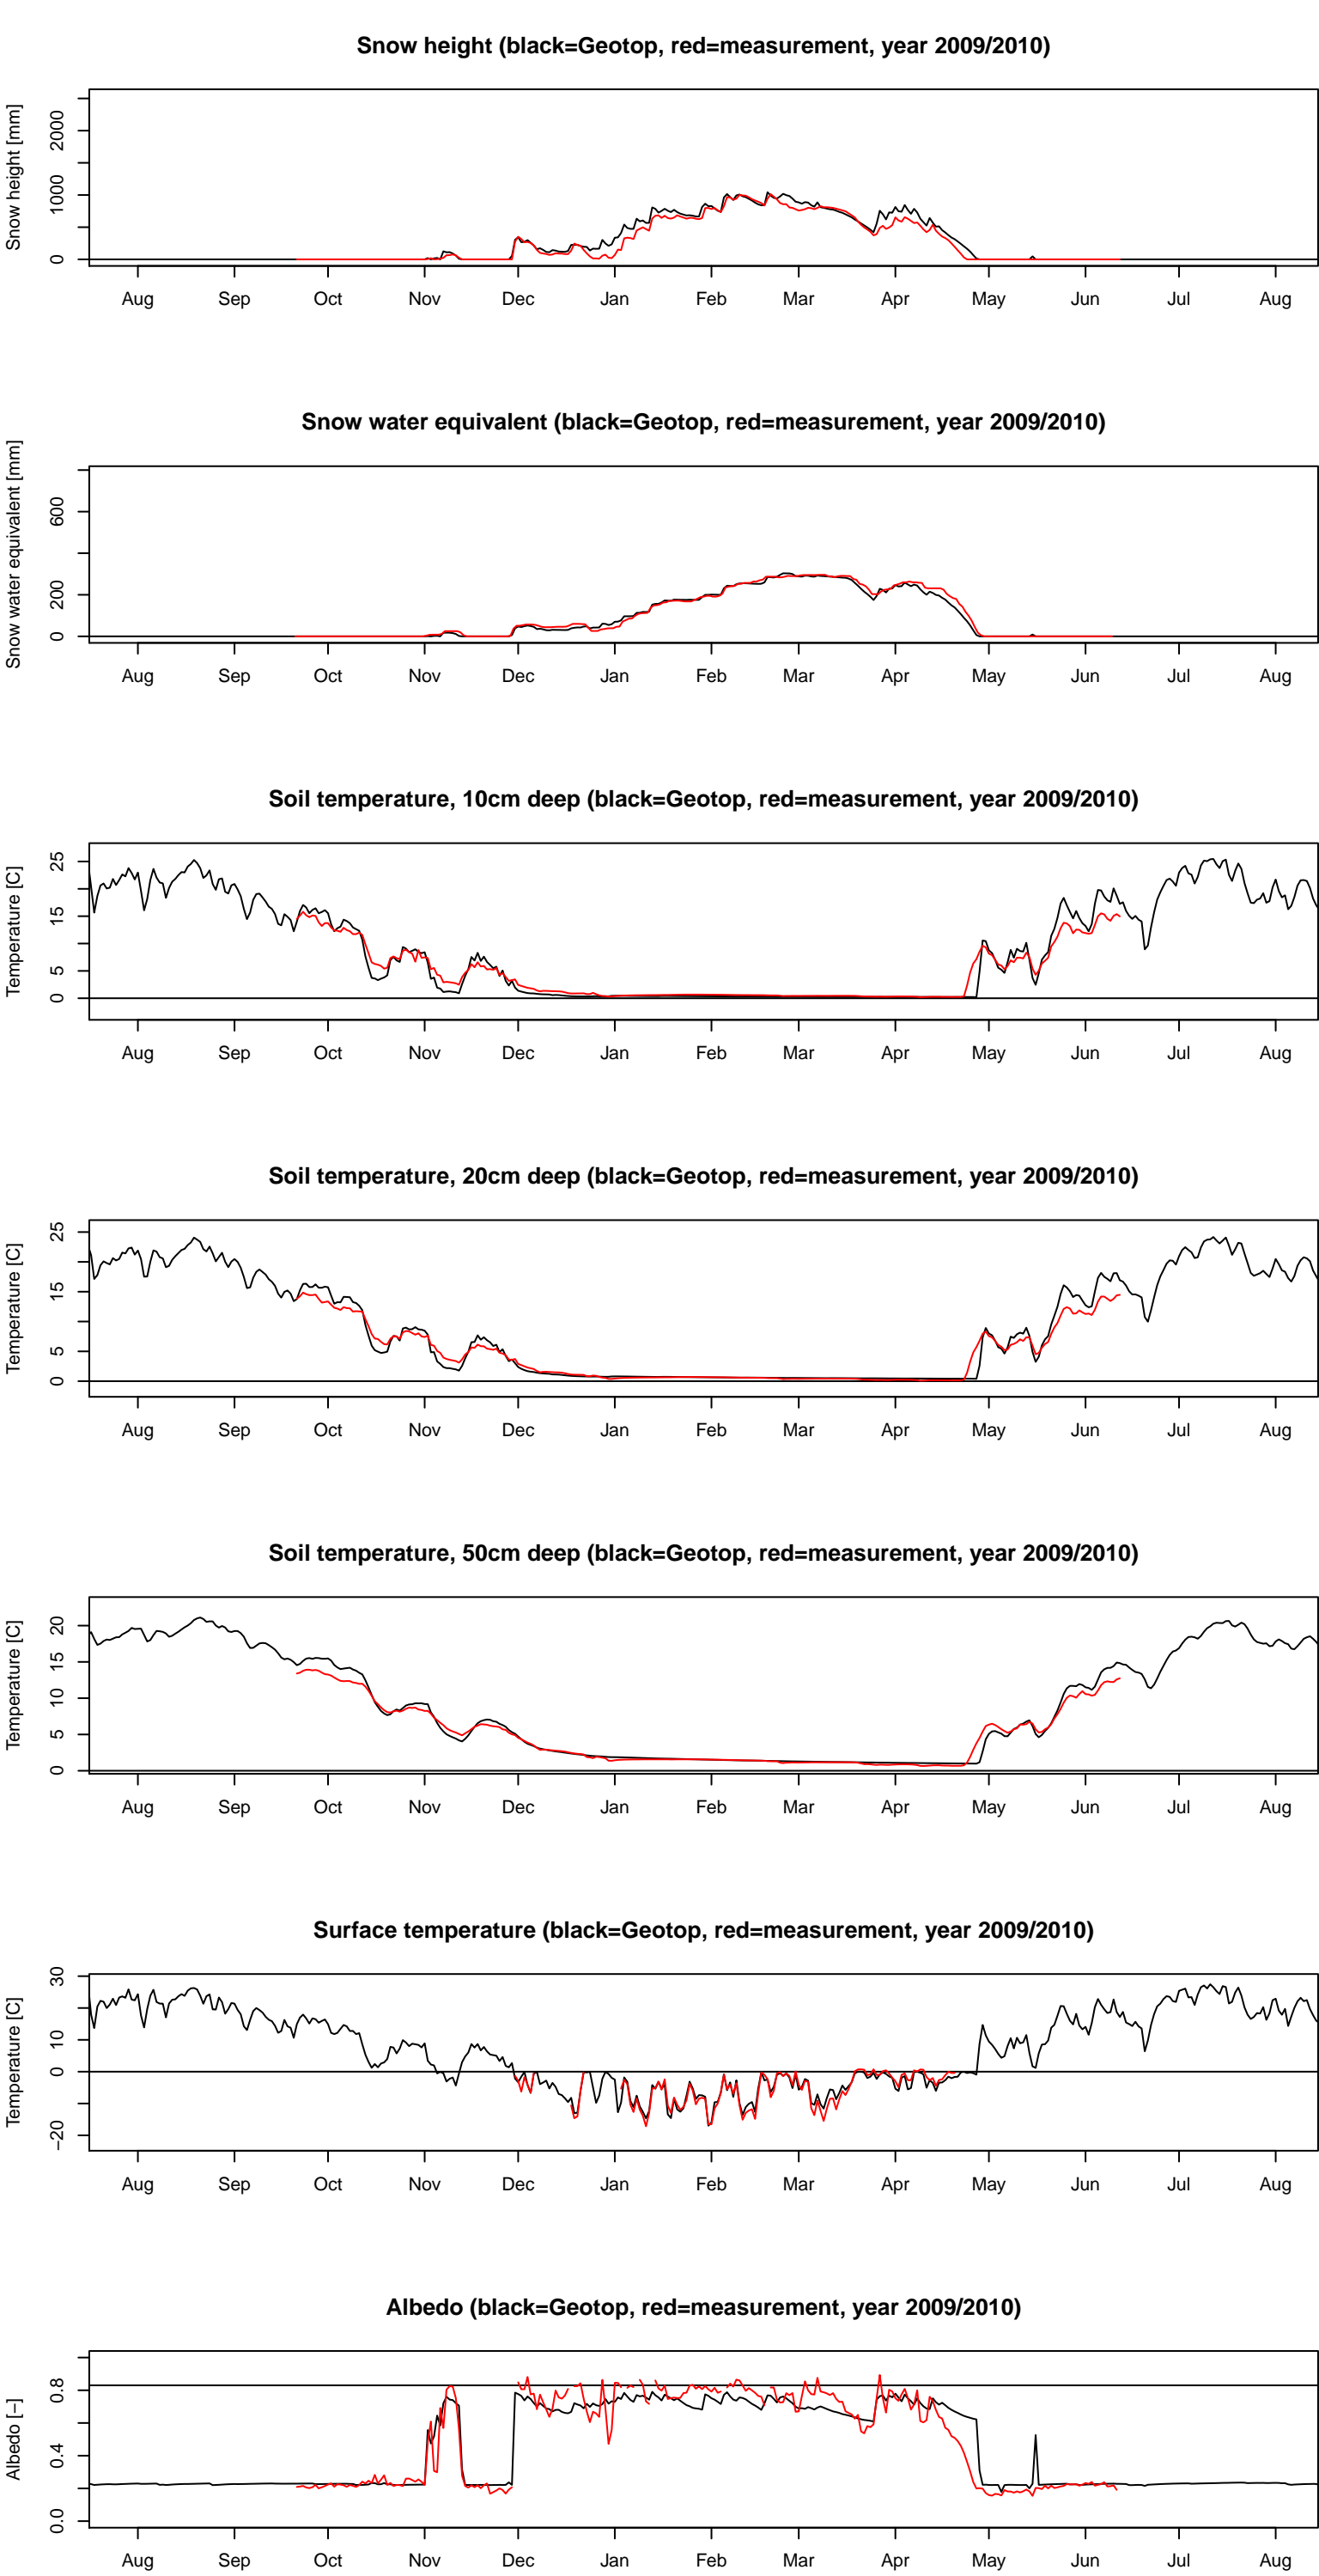

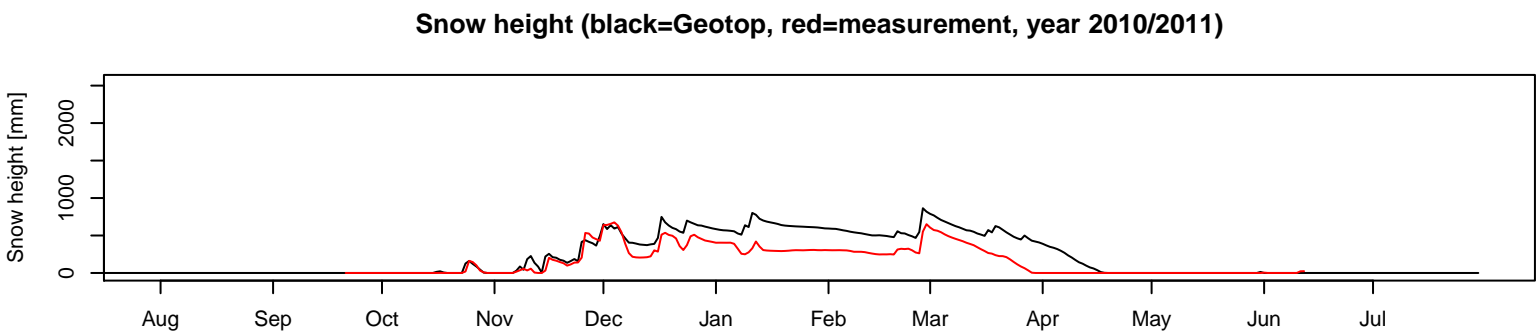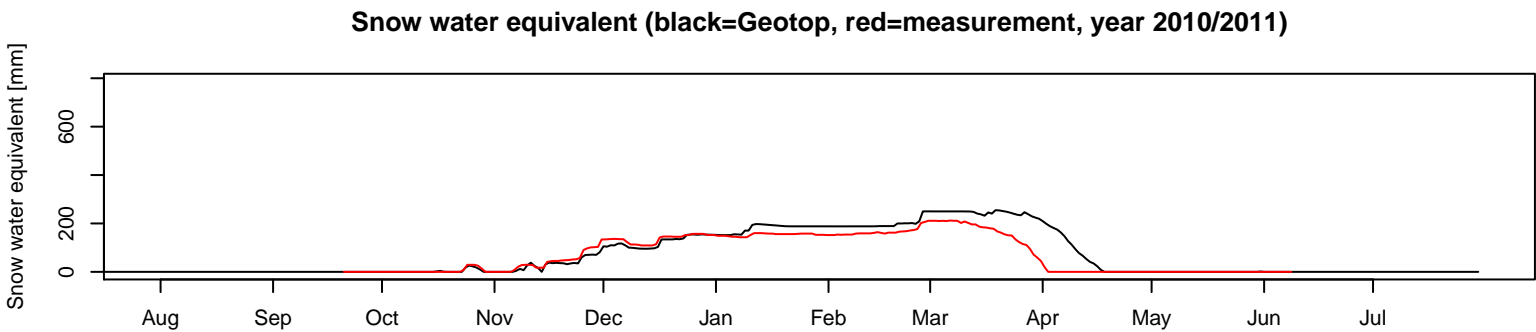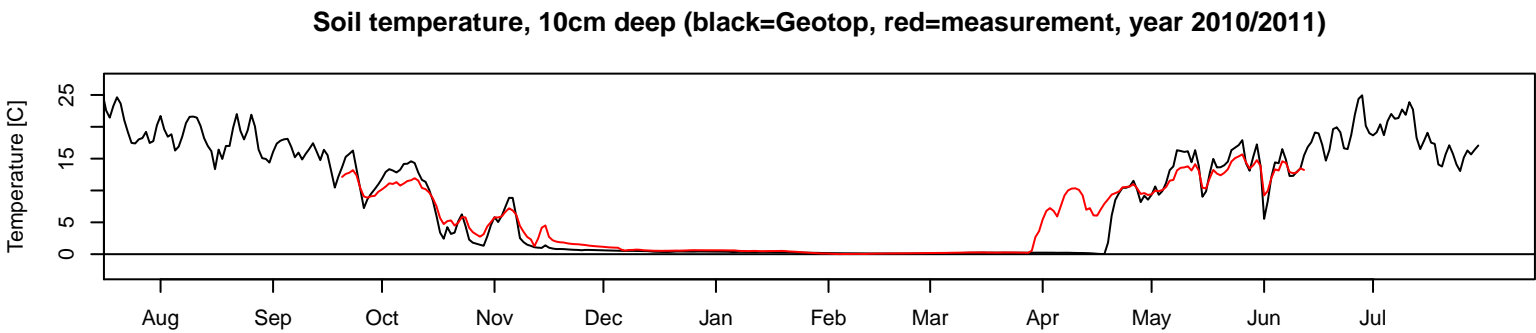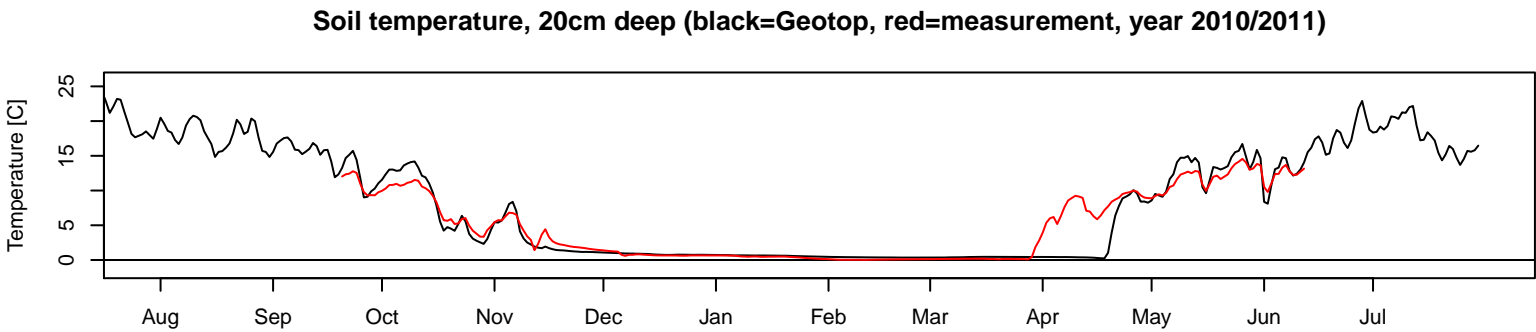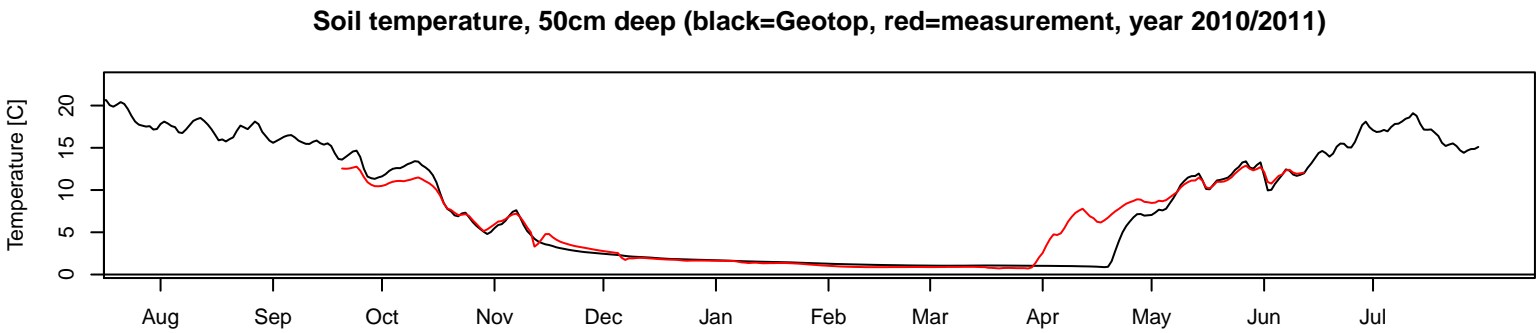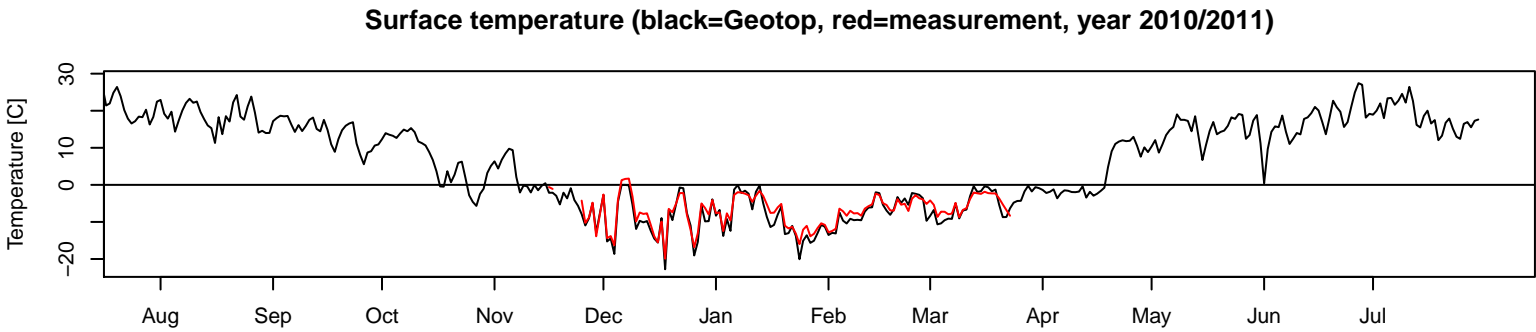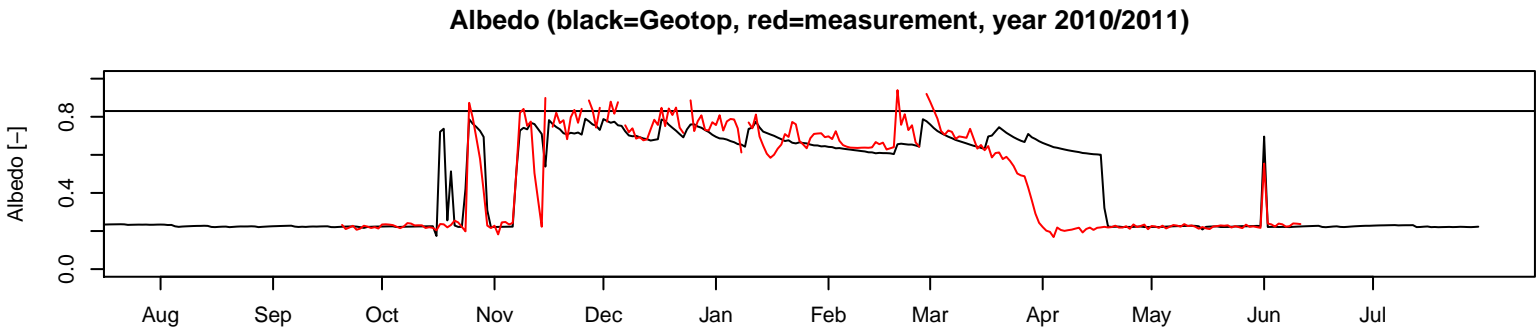

Supplement: Supplementary file 1 [file Geotop-ColDePorte.pdf › SupportingMaterial/ColDePorte/Geotop-ColDePorte.pdf]
